# Supplementary material for: The genome sequence and transcriptome of Potentilla micrantha and their comparison to Fragaria vesca (the woodland strawberry)
Source: PubMed Central journal article supplement (PMC5893959; doi:10.1093/gigascience/giy010), 2017-02-15
Supplement: giy010_giga-d-17-00155_original_submission.pdf [file giy010_giga-d-17-00155_original_submission.pdf]

# GigaScience

## The genome sequence and transcriptome of *Potentilla micrantha* shed light on the origins of strawberry fruit development

--Manuscript Draft--

|                                                      |                                                                                                                                                                                                                                                                                                                                                                                                                                                                                                                                                                                                                                                                                                                                                                                                                                                                                                                                                                                                                                                                                                                                                                                                                                                                                                                                                                                                                                                                                                                                                                                                                                                                                                                                                                                                                                                                                     |
|------------------------------------------------------|-------------------------------------------------------------------------------------------------------------------------------------------------------------------------------------------------------------------------------------------------------------------------------------------------------------------------------------------------------------------------------------------------------------------------------------------------------------------------------------------------------------------------------------------------------------------------------------------------------------------------------------------------------------------------------------------------------------------------------------------------------------------------------------------------------------------------------------------------------------------------------------------------------------------------------------------------------------------------------------------------------------------------------------------------------------------------------------------------------------------------------------------------------------------------------------------------------------------------------------------------------------------------------------------------------------------------------------------------------------------------------------------------------------------------------------------------------------------------------------------------------------------------------------------------------------------------------------------------------------------------------------------------------------------------------------------------------------------------------------------------------------------------------------------------------------------------------------------------------------------------------------|
| <b>Manuscript Number:</b>                            | GIGA-D-17-00155                                                                                                                                                                                                                                                                                                                                                                                                                                                                                                                                                                                                                                                                                                                                                                                                                                                                                                                                                                                                                                                                                                                                                                                                                                                                                                                                                                                                                                                                                                                                                                                                                                                                                                                                                                                                                                                                     |
| <b>Full Title:</b>                                   | The genome sequence and transcriptome of <i>Potentilla micrantha</i> shed light on the origins of strawberry fruit development                                                                                                                                                                                                                                                                                                                                                                                                                                                                                                                                                                                                                                                                                                                                                                                                                                                                                                                                                                                                                                                                                                                                                                                                                                                                                                                                                                                                                                                                                                                                                                                                                                                                                                                                                      |
| <b>Article Type:</b>                                 | Research                                                                                                                                                                                                                                                                                                                                                                                                                                                                                                                                                                                                                                                                                                                                                                                                                                                                                                                                                                                                                                                                                                                                                                                                                                                                                                                                                                                                                                                                                                                                                                                                                                                                                                                                                                                                                                                                            |
| <b>Funding Information:</b>                          |                                                                                                                                                                                                                                                                                                                                                                                                                                                                                                                                                                                                                                                                                                                                                                                                                                                                                                                                                                                                                                                                                                                                                                                                                                                                                                                                                                                                                                                                                                                                                                                                                                                                                                                                                                                                                                                                                     |
| <b>Abstract:</b>                                     | <p><b>Background:</b> The genus <i>Potentilla</i> is closely related to that of <i>Fragaria</i>, which contains the economically important cultivated strawberry <i>F. ×ananassa</i>. <i>Potentilla micrantha</i> is a species that does not develop berries, but shares numerous morphological and ecological characteristics with <i>F. vesca</i>. These similarities make <i>P. micrantha</i> an attractive choice for comparative genomics and expression studies with <i>F. vesca</i>: <i>Potentilla micrantha</i> genome was sequenced and annotated, and RNA-Seq data from the different developmental stages of flower and fruit of these two species were compared.</p> <p><b>Results:</b> Here we present a 327 Mbp sequence and annotation of the genome of <i>Potentilla micrantha</i>, spanning 2,674 sequence contigs, with an N50 size of 335,712. The sequence is estimated to cover 80% of the estimated total genome size of the species determined through flow cytometry. We show that the genus <i>Potentilla</i> has a characteristically larger genome size than <i>Fragaria</i>, however, the recovered sequence scaffolds were remarkably collinear with the genome of <i>F. vesca</i>, its closest sequenced relative. With 33,602 genes predicted, we argue that the majority, if not all of the gene-rich regions of the genome have been sequenced. Comparisons of RNA-Seq data from the stages of floral and fruit development revealed genes differentially expressed between <i>P. micrantha</i> and <i>F. vesca</i> during fruit development.</p> <p><b>Conclusions:</b> The new genome and transcriptome data are a valuable resource for future studies of fleshy berry development in <i>Fragaria</i> and fruit formation in the Rosaceae family. New data also shed light on the evolution of genome size and organization in this family.</p> |
| <b>Corresponding Author:</b>                         | Daniel James Sargent, PhD<br><br>UNITED KINGDOM                                                                                                                                                                                                                                                                                                                                                                                                                                                                                                                                                                                                                                                                                                                                                                                                                                                                                                                                                                                                                                                                                                                                                                                                                                                                                                                                                                                                                                                                                                                                                                                                                                                                                                                                                                                                                                     |
| <b>Corresponding Author Secondary Information:</b>   |                                                                                                                                                                                                                                                                                                                                                                                                                                                                                                                                                                                                                                                                                                                                                                                                                                                                                                                                                                                                                                                                                                                                                                                                                                                                                                                                                                                                                                                                                                                                                                                                                                                                                                                                                                                                                                                                                     |
| <b>Corresponding Author's Institution:</b>           |                                                                                                                                                                                                                                                                                                                                                                                                                                                                                                                                                                                                                                                                                                                                                                                                                                                                                                                                                                                                                                                                                                                                                                                                                                                                                                                                                                                                                                                                                                                                                                                                                                                                                                                                                                                                                                                                                     |
| <b>Corresponding Author's Secondary Institution:</b> |                                                                                                                                                                                                                                                                                                                                                                                                                                                                                                                                                                                                                                                                                                                                                                                                                                                                                                                                                                                                                                                                                                                                                                                                                                                                                                                                                                                                                                                                                                                                                                                                                                                                                                                                                                                                                                                                                     |
| <b>First Author:</b>                                 | Daniel James Sargent, PhD                                                                                                                                                                                                                                                                                                                                                                                                                                                                                                                                                                                                                                                                                                                                                                                                                                                                                                                                                                                                                                                                                                                                                                                                                                                                                                                                                                                                                                                                                                                                                                                                                                                                                                                                                                                                                                                           |
| <b>First Author Secondary Information:</b>           |                                                                                                                                                                                                                                                                                                                                                                                                                                                                                                                                                                                                                                                                                                                                                                                                                                                                                                                                                                                                                                                                                                                                                                                                                                                                                                                                                                                                                                                                                                                                                                                                                                                                                                                                                                                                                                                                                     |
| <b>Order of Authors:</b>                             | Daniel James Sargent, PhD<br>Matteo Buti, PhD<br>Elena Barghini, PhD<br>Marco Moretto, PhD<br>Flavia Mascagni, PhD<br>Lucia Natali, PhD<br>Matteo Brillì, PhD<br>Alexandre Lomsadze, PhD<br>Paolo Sonogo, PhD                                                                                                                                                                                                                                                                                                                                                                                                                                                                                                                                                                                                                                                                                                                                                                                                                                                                                                                                                                                                                                                                                                                                                                                                                                                                                                                                                                                                                                                                                                                                                                                                                                                                       |

|                                                                                                                                                                                                                                                                                                                                                                                                                                                                                                                               |                         |
|-------------------------------------------------------------------------------------------------------------------------------------------------------------------------------------------------------------------------------------------------------------------------------------------------------------------------------------------------------------------------------------------------------------------------------------------------------------------------------------------------------------------------------|-------------------------|
|                                                                                                                                                                                                                                                                                                                                                                                                                                                                                                                               | Lara Giongo, PhD        |
|                                                                                                                                                                                                                                                                                                                                                                                                                                                                                                                               | Michael Alonge, MSc     |
|                                                                                                                                                                                                                                                                                                                                                                                                                                                                                                                               | Riccardo Velasco, PhD   |
|                                                                                                                                                                                                                                                                                                                                                                                                                                                                                                                               | Claudio Varotto, PhD    |
|                                                                                                                                                                                                                                                                                                                                                                                                                                                                                                                               | Nada Surbanovski, PhD   |
|                                                                                                                                                                                                                                                                                                                                                                                                                                                                                                                               | Mark Borodovsky, PhD    |
|                                                                                                                                                                                                                                                                                                                                                                                                                                                                                                                               | Judson A Ward, PhD      |
|                                                                                                                                                                                                                                                                                                                                                                                                                                                                                                                               | Kristoff Engelen, PhD   |
|                                                                                                                                                                                                                                                                                                                                                                                                                                                                                                                               | Alessandro Cestaro, PhD |
|                                                                                                                                                                                                                                                                                                                                                                                                                                                                                                                               | Andrea Cavallini, PhD   |
| <b>Order of Authors Secondary Information:</b>                                                                                                                                                                                                                                                                                                                                                                                                                                                                                |                         |
| <b>Opposed Reviewers:</b>                                                                                                                                                                                                                                                                                                                                                                                                                                                                                                     |                         |
| <b>Additional Information:</b>                                                                                                                                                                                                                                                                                                                                                                                                                                                                                                |                         |
| <b>Question</b>                                                                                                                                                                                                                                                                                                                                                                                                                                                                                                               | <b>Response</b>         |
| Are you submitting this manuscript to a special series or article collection?                                                                                                                                                                                                                                                                                                                                                                                                                                                 | No                      |
| <b>Experimental design and statistics</b><br><br>Full details of the experimental design and statistical methods used should be given in the Methods section, as detailed in our <a href="#">Minimum Standards Reporting Checklist</a> . Information essential to interpreting the data presented should be made available in the figure legends.<br><br>Have you included all the information requested in your manuscript?                                                                                                  | Yes                     |
| <b>Resources</b><br><br>A description of all resources used, including antibodies, cell lines, animals and software tools, with enough information to allow them to be uniquely identified, should be included in the Methods section. Authors are strongly encouraged to cite <a href="#">Research Resource Identifiers</a> (RRIDs) for antibodies, model organisms and tools, where possible.<br><br>Have you included the information requested as detailed in our <a href="#">Minimum Standards Reporting Checklist</a> ? | Yes                     |
| <b>Availability of data and materials</b>                                                                                                                                                                                                                                                                                                                                                                                                                                                                                     | Yes                     |

All datasets and code on which the conclusions of the paper rely must be either included in your submission or deposited in [publicly available repositories](#) (where available and ethically appropriate), referencing such data using a unique identifier in the references and in the “Availability of Data and Materials” section of your manuscript.

Have you have met the above requirement as detailed in our [Minimum Standards Reporting Checklist?](#)

1 **The genome sequence and transcriptome of *Potentilla micrantha* shed light on the origins of**  
2 **strawberry fruit development**

3  
4  
5  
6  
7 4 Matteo Buti<sup>1,7</sup> ([mbuti78@gmail.com](mailto:mbuti78@gmail.com)), Marco Moretto<sup>1</sup> ([marco.moretto@fmach.it](mailto:marco.moretto@fmach.it)), Elena Barghini<sup>2</sup>  
8  
9 ([elena.barghini@gmail.com](mailto:elena.barghini@gmail.com)), Flavia Mascagni<sup>2</sup> ([flaviamascagni@gmail.com](mailto:flaviamascagni@gmail.com)), Lucia Natali<sup>2</sup>  
10 5 ([lucia.natali@unipi.it](mailto:lucia.natali@unipi.it)), Matteo Brilli<sup>1,3</sup> ([matteo.brilli.bip@gmail.com](mailto:matteo.brilli.bip@gmail.com)), Alexandre Lomsadze<sup>4</sup>  
11  
12 6 ([alexandre.lomsadze@bme.gatech.edu](mailto:alexandre.lomsadze@bme.gatech.edu)), Paolo Sonogo<sup>1</sup> ([paolo.sonogo@fmach.it](mailto:paolo.sonogo@fmach.it)), Lara Giongo<sup>1</sup>  
13  
14 7 ([lara.giongo@fmach.it](mailto:lara.giongo@fmach.it)), Michael Alonge<sup>5</sup> ([michael.alonge@driscolls.com](mailto:michael.alonge@driscolls.com)), Riccardo Velasco<sup>1</sup>  
15  
16 8 ([riccardo.velasco@fmach.it](mailto:riccardo.velasco@fmach.it)), Claudio Varotto<sup>1</sup> ([claudio.varotto@fmach.it](mailto:claudio.varotto@fmach.it)), Nada Šurbanovski<sup>1</sup>  
17  
18 9 ([surbanovski.nada@gmail.com](mailto:surbanovski.nada@gmail.com)), Mark Borodovsky<sup>3</sup> ([borodovsky@gatech.edu](mailto:borodovsky@gatech.edu)), Judson A. Ward<sup>4</sup>  
19  
20 10 ([judson.ward@driscolls.com](mailto:judson.ward@driscolls.com)), Kristof Engelen<sup>1</sup> ([engelen.kristof@gmail.com](mailto:engelen.kristof@gmail.com)), Alessandro Cestaro<sup>1</sup>  
21  
22 11 ([alessandro.cestaro@fmach.it](mailto:alessandro.cestaro@fmach.it)), Andrea Cavallini<sup>2</sup> ([andrea.cavallini@unipi.it](mailto:andrea.cavallini@unipi.it)), Daniel James Sargent  
23  
24 12  
25  
26  
27  
28  
29 13  
30  
31  
32  
33  
34 14  
35  
36  
37  
38  
39 15  
40  
41  
42  
43  
44 16  
45  
46  
47  
48  
49 17  
50  
51  
52  
53  
54  
55  
56 18  
57  
58  
59  
60  
61 19  
62  
63  
64  
65

<sup>1</sup>Fondazione Edmund Mach, Centre for Research and Innovation, via Mach 1, San Michele  
all'Adige, 38010 (TN), Italy

<sup>2</sup>Department of Agricultural, Food, and Environmental Sciences, University of Pisa, Pisa I-56124,  
Italy.

<sup>3</sup>Department of Agronomy, Food, Natural Resources, Animals and Environment, University of  
Padova Agripolis, V.le dell'Università 16, 35020 Legnaro (PD), Italy.

<sup>4</sup>Wallace H. Coulter Department of Biomedical Engineering, Georgia Tech, Atlanta, GA 30332,  
USA.

<sup>5</sup>Driscoll's Strawberry Associates, Cassin Ranch, 121 Silliman Drive, Watsonville, California,  
USA.

<sup>6</sup>Driscoll's Genetics Limited, East Malling Enterprise Centre, New Road, East Malling, Kent ME19  
6BJ, UK.

1 <sup>7</sup>Center for the Development and Improvement of Agri-Food Resources (BIOGEST-SITEIA)

2 University of Modena and Reggio Emilia, P.le Europa 1, 42124 Reggio nell'Emilia (RE), Italy

3 \*Corresponding Author

## 4 5 **ABSTRACT**

6  
7  
8  
9  
10  
11  
12 **Background:** The genus *Potentilla* is closely related to that of *Fragaria*, which contains the  
13  
14 economically important cultivated strawberry *F. ×ananassa*. *Potentilla micrantha* is a species that  
15  
16 does not develop berries, but shares numerous morphological and ecological characteristics with  
17  
18 *F. vesca*. These similarities make *P. micrantha* an attractive choice for comparative genomics and  
19  
20 expression studies with *F. vesca*: *Potentilla micrantha* genome was sequenced and annotated, and  
21  
22  
23  
24  
25 RNA-Seq data from the different developmental stages of flower and fruit of these two species were  
26  
27 compared.

28  
29 **Results:** Here we present a 327 Mbp sequence and annotation of the genome of *Potentilla micrantha*,  
30  
31 spanning 2,674 sequence contigs, with an N50 size of 335,712. The sequence is estimated to cover  
32  
33 80% of the estimated total genome size of the species determined through flow cytometry. We show  
34  
35 that the genus *Potentilla* has a characteristically larger genome size than *Fragaria*, however, the  
36  
37 recovered sequence scaffolds were remarkably collinear with the genome of *F. vesca*, its closest  
38  
39  
40 sequenced relative. With 33,602 genes predicted, we argue that the majority, if not all of the gene-  
41  
42 rich regions of the genome have been sequenced. Comparisons of RNA-Seq data from the stages of  
43  
44  
45 floral and fruit development revealed genes differentially expressed between *P. micrantha* and  
46  
47  
48 *F. vesca* during fruit development.

49  
50  
51 **Conclusions:** The new genome and transcriptome data are a valuable resource for future studies of  
52  
53  
54  
55 fleshy berry development in *Fragaria* and fruit formation in the Rosaceae family. New data also shed  
56  
57 light on the evolution of genome size and organization in this family.

1 *Keywords:* long-read sequencing; evolutionary development; angiosperms; genome sequence;  
2 transcriptomics;

## 7 **BACKGROUND**

9 *Potentilla*, a genus of approximately 500 species [1], is closely-related to that of *Fragaria* [2], the  
10 genera having diverged from a common ancestor just 24 million years ago [3]. The genus *Fragaria*,  
11 a member of the Fragariinae tribe of the Rosaceae family, is economically-important due to the  
12 sweet, aromatic accessory fruits (berries) produced by members of the genus, in particular those of  
13 the cultivated allo-octoploid ( $2n=8\times=56$ ) strawberry species *F. \times ananassa*. A significant research  
14 effort was invested into improvements in yield and fruit quality of the berries of the cultivated  
15 strawberry, the focus of which has included the physiological, metabolic, and genomic changes taking  
16 place during berry development and ripening [4–8]. In addition, numerous resources have been  
17 developed to assist both applied and basic research, including a genome sequence for the wild diploid  
18 relative of the cultivated strawberry, the woodland strawberry *F. vesca* ( $2n=2\times=14$ ) [9]. The  
19 availability of this genomic sequence facilitated further investigation of the molecular basis of many  
20 traits of economic and academic interest, including the development of accessory fruits. However, all  
21 members of the *Fragaria* genus produce berries, and as such the use of reverse genetics approaches  
22 to study the genes involved in berry evolution and development would require *Fragaria* mutants that  
23 do not produce fruits, a resource that is not currently available.

24 In the post genomics era comparative analysis permits the study of related, yet divergent species, by  
25 tracing changes at the genomic and transcriptomic levels responsible for their phenotypic differences.

26 Previously, the sequenced genomes of *F. vesca*, *Prunus persica* and *Malus \times domestica* were  
27 compared [10]; the study revealed insights into the evolutionary mechanisms that have shaped the  
28 three species, demonstrating that the *Fragaria* genome underwent significant small-scale structural  
29 rearrangement since it diverged from the common ancestor of the three genera. Comparisons of global  
30 gene expression between species, such as one performed between wild and cultivated tomato species

1 [11], can reveal patterns of selection that have led to domestication, or to differences in gene  
2 expression in response to environmental conditions, such as cold stress in banana and plantain [12].

3  
4 Comparative transcriptomics can also be used to reveal differences in the expression of orthologous  
5 genes between organisms at different stages of physiological development [13]. Such an approach  
6 suggests that comparative analyses between *Fragaria* and a closely-related species that does not bear  
7 berries may reveal important insights into the evolution of fruit development. Additionally, species  
8 separation is often related to changes in genome structure, and genome size in particular. Differences  
9 in genome size are often the consequence of polyploidization events and/or changes in the abundance  
10 of repetitive DNA, especially transposable elements [14].

11  
12 The *Potentilla* genus contains a single species (*P. indica*) that produces accessory fruits, or berries,  
13 similar in size and appearance to those of the genus *Fragaria*. However, the polyphyly of *Fragaria*  
14 and *Potentilla* demonstrates that the berry-bearing habit evolved independently in the Fragariinae  
15 on a number of occasions [2], and that its evolution might therefore involve relatively simple genomic  
16 mechanisms. The remaining *Potentilla* species do not produce accessory fruits, but their close  
17 relationship with *Fragaria* make them ideal surrogate species for comparisons with *F. vesca* to  
18 elucidate the genetic basis of evolution and development of strawberry fleshy fruit.

19  
20 *Potentilla micrantha* is a species that does not develop accessory fruits but shares numerous  
21 morphological characteristics with *F. vesca* (Fig. 1) including plant habit and flower morphology.

22  
23 Notably, they grow within the same ecological niches, and where their ranges of distribution overlap,  
24 *P. micrantha* can be found growing nearby populations of *F. vesca* (Sargent, unpublished results).

25  
26 These striking similarities make *P. micrantha* an attractive choice for comparative genomics studies  
27 with *F. vesca*. As a precursor to a whole genome sequencing initiative, an initial sequencing project  
28 focused on the *P. micrantha* chloroplast was undertaken using the Illumina HiSeq and PacBio RS  
29 sequencing platforms [15].

30  
31 For comparative genomic and transcriptomic studies of *P. micrantha* and *F. vesca*, a genomic toolkit  
32 for the two species was developed. The genome size of *P. micrantha* was determined and the nuclear

1 genome was sequenced and assembled from Illumina and PacBio sequencing reads. Gene predictions  
2 from the *P. micrantha* genome were made with support of RNA-Seq data generated from tissue  
3 libraries sampled during flower and fruit development. The genomes of *F. vesca* and *P. micrantha*  
4 were compared and whilst they exhibited a remarkable degree of collinearity, large-scale differences  
5 in transposon activity were identified that could lead to large differences in genome size between the  
6 two species. A comparative transcriptomics study of MADs-box genes also revealed differences in  
7 gene copy number and expression patterns between the species, which could be responsible for the  
8 phenotypic differences in fruit development.

## 9 RESULTS

### 10 Flow cytometry, heterozygosity estimation and genome assembly

11 DNA was extracted from *Potentilla micrantha* young, unexpanded leaves. Flow cytometry using a  
12 *V. minor* internal standard with a DNA content of 1.52 pg/2C returned average DNA quantities of  
13 0.52 pg/2C for *F. vesca* ‘Hawaii 4’ and 0.83 pg/2C for *P. micrantha* over three biological replicates.  
14 Using the calculation of Dolezel et al. (2003) [16] that 1 pg DNA is equivalent to 978 Mbp of DNA  
15 sequence, the genome size of *P. micrantha* was determined as 405.87 Mbp in length whilst that of  
16 *F. vesca* ‘Hawaii 4’ was calculated to be 254.28 Mbp.

17 Data were returned for the OLF and all four MP libraries sequenced using Illumina HiSeq. In total,  
18 61.4 Gbp of data were returned and the relative depth of coverage obtained for the *P. micrantha*  
19 genome from each library is given in Additional File 1: Table S1. Four different PacBio RS  
20 sequencing libraries were constructed and sequenced using two different versions of the PacBio  
21 chemistry (Additional File 1: Table S2). From the sequencing of 63 SMRT cells, 6,447,413 sequences  
22 with an average length of 2,221 bp were recovered, totaling 14.32 Gb of long read sequence data.  
23 From the data, 33× equivalent of sequence was contained in reads longer than 1 kb which were used  
24 for gap filling of the Illumina assembly using PBJelly [17].



1 The initial ALLPATHS assembly of the Illumina short-read sequences produced 33,026 contigs with  
2 an N50 of 16,235 bp and a total length of 247,565,733 bp. Following scaffolding, a genome assembly  
3 with a total length of 315,266,043 bp contained in 2,866 sequencing scaffolds was returned. The final  
4 scaffold set returned following ALLPATHS assembly contained a total of 0.07% ambiguous sites  
5 (SNPs), revealing the genome of *P. micrantha* to be one of the most homozygous naturally-occurring  
6 genomes sequenced to date. Following incorporation of the PacBio RS data using PBJelly [17], the  
7 *P. micrantha* sequence assembly contained 326,533,584 bp of sequence data, a 3.5% increase over  
8 the ALLPATHS Illumina assembly, in 2,674 scaffolds. The longest and N50 scaffold lengths both  
9 increased following gap filling by 9.3% and 5.1% respectively, but most significantly, the number of  
10 gapped Ns in the assembly was reduced by 59.7% to 27,311,787 (8.4% of the final assembly) (Table  
11 1). The final scaffolded assembly contained 80.45% of the total estimated genome size for  
12 *P. micrantha* as calculated by flow cytometry. Sequence scaffold size ranged from 935 bp to  
13 3,488,351 bp. Of the 2,674 scaffolds, 878 (32.8%) were less than 10 kbp in length, 534 (20%) were  
14 between 10 and 50 kbp in length, 738 (27.6%) were between 50 and 200 kbp in length, 500 (18.7%)  
15 contained between 200 kbp and 1 Mbp of sequence, and the remaining 23 (0.9%) contained over 1  
16 Mbp of sequence.

## 17 **Gene prediction and preliminary annotation**

18 The results of the combined alignment of the 12 RNA-seq read sets to the *Potentilla* genome sequence  
19 scaffolds and number of splice sites identified using STAR is presented in Additional File 1: Table  
20 S3. A total of 1,908 consensus repeat sequences were generated by RepeatModeler totaling  
21 1,431,262 bp and having a GC content of 40.8%. The total ATCG content of sequencing scaffolds  
22 greater than 10 kb in length was 298,987,576 bp. A total of 138,597,969 bp (46.36%) of the genome  
23 sequence were masked using the consensus sequences in the RepeatModeler library, including 26,359  
24 (7.5%) of the mapped GT-AG introns identified by STAR. Gene prediction using GeneMark-ET on  
25 the masked genome identified a total of 33,602 genes, of which 32,137 were predictions containing

1 multiple exons, and 4,655 were single exon predictions. A total of 172,791 exons were predicted,  
2 with an average length of 223 bp and an average of 5.14 exons per gene. A total of 139,216 introns  
3 were predicted in the CDs of the genes, with an average intron length of 499 bp. Following a local  
4 BLAST search and BLAST2GO analysis, a total of 27,968 genes were assigned a preliminary gene  
5 annotation.

### 7 **Scaffold anchoring and synteny to the *Fragaria vesca* Fvb genome sequence**

8 Following BLAST analysis, a total of 24,641 *P. micrantha* genes returned significant hits to the  
9 *F. vesca* v2.0 pseudomolecules. A total of 1,682 *P. micrantha* sequence scaffolds, containing  
10 315,081,089 bp (96.5% of the total sequence) contained at least one gene that was anchored to one  
11 of the *F. vesca* v2.0 pseudomolecules. Of those, 573 contained at least ten orthologous gene sequences,  
12 118 contained at least 50 orthologous sequences and 32 contained over 100 orthologous  
13 (Supplementary Excel File 1). Scaffold ‘Contig145’, the largest scaffold in the *P. micrantha* genome  
14 sequence (3,488,351 bp) contained the largest number of orthologous gene sequences anchored to the  
15 *F. vesca* v2.0 genome sequence (560), whilst scaffold ‘Contig2191’ was the smallest anchored  
16 scaffold at 1,163 bp, and containing a single orthologous gene sequence. Comparison of the two  
17 genomes revealed a remarkable degree of synteny with *P. micrantha* scaffolds spanning the entirety  
18 of the *F. vesca* genome sequence (Fig. 2). A very high degree of collinearity in gene order between  
19 the two genomes was observed, and in general, only a small number of inversions were observed  
20 between syntenic blocks studied between the two genomes.

### 22 **Gene expression during fruit development**

23 Tissues from five stages of flowering and ‘fruit’ development were harvested from *Potentilla*  
24 *micrantha* untreated flowers in biological duplicates or triplicates for RNA isolation. The stages of  
25 flowering followed those identified in *Fragaria* by Kang et al. (2013) [8], with the addition of a stage  
26 0 (unopened flowers) and young unexpanded leaf tissue. The selected developmental stages are

1 shown in Fig. 3. RNA-libraries were made and sequenced with Illumina HiSeq2000. Following QC  
2 and adapters trimming, a total of 619,085,115 101 bp paired reads were obtained from the 12  
3  
4  
5 *P. micrantha* RNA-seq libraries. Sequencing yield from individual libraries ranged from 29,653,058  
6  
7 to 60,158,302 reads per sample (Additional File 1: Table S4).

8  
9  
10 Following trimming, the number of reads available for *Fragaria* from the published sequences of  
11  
12 Kang et al. (2013) [8] were 1,236,882,540, with reads per library ranging from 109,643,225 to  
13  
14 155,643,061. Between 62% and 69% of *P. micrantha* filtered reads per library mapped to the *P.*  
15  
16 *micrantha* gene prediction set, whilst similarly 63% to 67% of *F. vesca* filtered reads per library  
17  
18 mapped to the *F. vesca* gene prediction set (Additional File 1: Table S4).

19  
20  
21 A total of 1,556 genes were differentially expressed between the four developmental stages in at least  
22  
23 one pair-wise comparison of the different stages in *P. micrantha*, whilst 816 genes were differentially  
24  
25 expressed in *F. vesca* between the four stages (Fig. 4). A total of 52.44% and 43.38% of the  
26  
27 differentially expressed genes were GO-annotated for *P. micrantha* and *F. vesca* respectively  
28  
29  
30  
31 (Additional File 2: Fig. S1).

### 32 33 34 35 36 **Analysis of MADs-box conserved domain-containing genes in *Potentilla* and *Fragaria***

37  
38  
39 A total of 75 *P. micrantha* and 81 *F. vesca* predicted proteins containing MADS-box conserved  
40  
41 domains were aligned and phylogenetic trees were constructed to reliably identify orthology  
42  
43 relationships between *P. micrantha* and *F. vesca* genes.

44  
45  
46 The three methods employed for phylogenetic reconstruction (ML, MP, NJ) returned largely  
47  
48 congruent topologies for the nodes with more than 50% bootstrap support, with NJ providing a  
49  
50 slightly more resolved tree given the use of a pairwise, instead of a partial deletion approach. Fig. 5  
51  
52 displays the phylogenetic reconstruction of the *P. micrantha* and *F. vesca* genes containing MADs-  
53  
54 box, along with the gene expression levels for each gene. The majority of the genes were retained  
55  
56 after the divergence of the species, indicated by a large proportion of orthologous pairs retrieved.  
57  
58  
59  
60 Only a few events of lineage-specific gene loss/duplication were observed. Both observations are in  
61  
62

1 line with the lack of ploidy changes within *P. micrantha* and *F. vesca* in the estimated 24.22 million  
2 years since species divergence. As expected, the majority of orthologous pairs shared similar  
3 expression patterns. Based on the Maximum Likelihood gene tree however, three clades of  
4 orthologous genes were identified that were not expressed or poorly expressed in *P. micrantha* but  
5 highly expressed in *F. vesca* (Fig. 6). The three clades, numbered as 1, 2 and 3 on Fig. 6, contained  
6 the following genes: clade 1 contained genes 27280\_t (*P. micrantha*) and gene25871-v1.0-hybrid  
7 (*F. vesca*), which displayed highest homology to *A. thaliana* AGL36, a sequence-specific DNA  
8 binding transcription factor active during endosperm development [18]; clade 2 contained genes  
9 26598\_t (*P. micrantha*) and gene18483-v1.0-hybrid (*F. vesca*), whose closest *A. thaliana* homologue  
10 was AGL62, a MADS gene that promotes embryo development, indicating an essential role of  
11 endosperm cellularization for viable seed formation [19]; and clade 3 contained *P. micrantha* genes  
12 23638\_t, 23641t and 759\_t and *F. vesca* genes gene32155-v1.0-hybrid and gene13277-v1.0-hybrid,  
13 whose closest *A. thaliana* homologue AGL15 delays senescence programs in perianth organs and  
14 developing fruits and alters the process of seed desiccation [20].

### 16 **Analysis of the repetitive component of the *Potentilla micrantha* genome**

17 In total, 1,001,838 of 1,484,780 reads clustered with RepeatExplorer were grouped into 107,190  
18 clusters, representing 67.5% of the genome. No predominant repeat families were identified in the  
19 *P. micrantha* genome, with the most redundant repeat cluster representing just 1.18% of the total  
20 genome length. LTR-retrotransposons made up the main fraction (24.1%) of the *P. micrantha*  
21 genome (Fig. 7), with a *Gypsy* to *Copia* ratio of approximately 2:1. Terminal-repeat retrotransposons  
22 in miniature (TRIMs) were poorly represented, making up just 0.2% of the genome, whilst putative  
23 DNA transposons accounted for 5.7% of the genome and included putative CACTA, Harbinger, and  
24 hAT elements. Unclassified repeats accounted for 10.6% of the genome. A comparison of the  
25 repetitive portion of the *F. vesca* and *P. micrantha* genomes performed by pairwise clustering of  
26 Illumina sequence reads revealed significant diversification between the repetitive component of the

1 genomes of the two species (Additional File 2: Fig. S2). Among the top 291 repeat clusters that had  
2 a genome proportion >0.01%, 107 were specific to *P. micrantha*, 51 were specific to *F. vesca*, whilst  
3  
4 only 25 were similarly represented in the two species. Among all repeat classes, only ribosomal DNAs  
5  
6  
7 show similar genome proportions between *P. micrantha* and *F. vesca*.

### 11 ***Potentilla* full-length LTR-RE characterization, annotation and insertion age**

12  
13  
14 Of the 505 LTR-REs characterised, 220 (43.6%) belonged to the *Copia* superfamily, with the greatest  
15  
16 proportion belonging to the *Bianca* family, 256 (50.7%) belonged to the *Gypsy* superfamily, with the  
17  
18 greatest proportion belonging to the *Ogre/TAT* family, whilst the remaining 29 (5.7%) could not be  
19  
20 placed into a specific superfamily. Table 2 lists the proportion of the annotated 505 LTR-REs in each  
21  
22  
23  
24  
25  
26  
27  
28 super-families.

29  
30 The optimal stringency parameters (with a similarity and length fraction = 0.8) were used to map the  
31  
32  
33  
34  
35  
36  
37  
38  
39  
40  
41  
42  
43  
44  
45  
46  
47  
48  
49  
50  
51  
52  
53  
54  
55  
56  
57  
58  
59  
60  
61  
62  
63  
64  
65  
66  
67  
68  
69  
70  
71  
72  
73  
74  
75  
76  
77  
78  
79  
80  
81  
82  
83  
84  
85  
86  
87  
88  
89  
90  
91  
92  
93  
94  
95  
96  
97  
98  
99  
100  
101  
102  
103  
104  
105  
106  
107  
108  
109  
110  
111  
112  
113  
114  
115  
116  
117  
118  
119  
120  
121  
122  
123  
124  
125  
126  
127  
128  
129  
130  
131  
132  
133  
134  
135  
136  
137  
138  
139  
140  
141  
142  
143  
144  
145  
146  
147  
148  
149  
150  
151  
152  
153  
154  
155  
156  
157  
158  
159  
160  
161  
162  
163  
164  
165  
166  
167  
168  
169  
170  
171  
172  
173  
174  
175  
176  
177  
178  
179  
180  
181  
182  
183  
184  
185  
186  
187  
188  
189  
190  
191  
192  
193  
194  
195  
196  
197  
198  
199  
200  
201  
202  
203  
204  
205  
206  
207  
208  
209  
210  
211  
212  
213  
214  
215  
216  
217  
218  
219  
220  
221  
222  
223  
224  
225  
226  
227  
228  
229  
230  
231  
232  
233  
234  
235  
236  
237  
238  
239  
240  
241  
242  
243  
244  
245  
246  
247  
248  
249  
250  
251  
252  
253  
254  
255  
256  
257  
258  
259  
260  
261  
262  
263  
264  
265  
266  
267  
268  
269  
270  
271  
272  
273  
274  
275  
276  
277  
278  
279  
280  
281  
282  
283  
284  
285  
286  
287  
288  
289  
290  
291  
292  
293  
294  
295  
296  
297  
298  
299  
300  
301  
302  
303  
304  
305  
306  
307  
308  
309  
310  
311  
312  
313  
314  
315  
316  
317  
318  
319  
320  
321  
322  
323  
324  
325  
326  
327  
328  
329  
330  
331  
332  
333  
334  
335  
336  
337  
338  
339  
340  
341  
342  
343  
344  
345  
346  
347  
348  
349  
350  
351  
352  
353  
354  
355  
356  
357  
358  
359  
360  
361  
362  
363  
364  
365  
366  
367  
368  
369  
370  
371  
372  
373  
374  
375  
376  
377  
378  
379  
380  
381  
382  
383  
384  
385  
386  
387  
388  
389  
390  
391  
392  
393  
394  
395  
396  
397  
398  
399  
400  
401  
402  
403  
404  
405  
406  
407  
408  
409  
410  
411  
412  
413  
414  
415  
416  
417  
418  
419  
420  
421  
422  
423  
424  
425  
426  
427  
428  
429  
430  
431  
432  
433  
434  
435  
436  
437  
438  
439  
440  
441  
442  
443  
444  
445  
446  
447  
448  
449  
450  
451  
452  
453  
454  
455  
456  
457  
458  
459  
460  
461  
462  
463  
464  
465  
466  
467  
468  
469  
470  
471  
472  
473  
474  
475  
476  
477  
478  
479  
480  
481  
482  
483  
484  
485  
486  
487  
488  
489  
490  
491  
492  
493  
494  
495  
496  
497  
498  
499  
500  
501  
502  
503  
504  
505  
506  
507  
508  
509  
510  
511  
512  
513  
514  
515  
516  
517  
518  
519  
520  
521  
522  
523  
524  
525  
526  
527  
528  
529  
530  
531  
532  
533  
534  
535  
536  
537  
538  
539  
540  
541  
542  
543  
544  
545  
546  
547  
548  
549  
550  
551  
552  
553  
554  
555  
556  
557  
558  
559  
560  
561  
562  
563  
564  
565  
566  
567  
568  
569  
570  
571  
572  
573  
574  
575  
576  
577  
578  
579  
580  
581  
582  
583  
584  
585  
586  
587  
588  
589  
590  
591  
592  
593  
594  
595  
596  
597  
598  
599  
600  
601  
602  
603  
604  
605  
606  
607  
608  
609  
610  
611  
612  
613  
614  
615  
616  
617  
618  
619  
620  
621  
622  
623  
624  
625  
626  
627  
628  
629  
630  
631  
632  
633  
634  
635  
636  
637  
638  
639  
640  
641  
642  
643  
644  
645  
646  
647  
648  
649  
650  
651  
652  
653  
654  
655  
656  
657  
658  
659  
660  
661  
662  
663  
664  
665  
666  
667  
668  
669  
670  
671  
672  
673  
674  
675  
676  
677  
678  
679  
680  
681  
682  
683  
684  
685  
686  
687  
688  
689  
690  
691  
692  
693  
694  
695  
696  
697  
698  
699  
700  
701  
702  
703  
704  
705  
706  
707  
708  
709  
710  
711  
712  
713  
714  
715  
716  
717  
718  
719  
720  
721  
722  
723  
724  
725  
726  
727  
728  
729  
730  
731  
732  
733  
734  
735  
736  
737  
738  
739  
740  
741  
742  
743  
744  
745  
746  
747  
748  
749  
750  
751  
752  
753  
754  
755  
756  
757  
758  
759  
760  
761  
762  
763  
764  
765  
766  
767  
768  
769  
770  
771  
772  
773  
774  
775  
776  
777  
778  
779  
780  
781  
782  
783  
784  
785  
786  
787  
788  
789  
790  
791  
792  
793  
794  
795  
796  
797  
798  
799  
800  
801  
802  
803  
804  
805  
806  
807  
808  
809  
810  
811  
812  
813  
814  
815  
816  
817  
818  
819  
820  
821  
822  
823  
824  
825  
826  
827  
828  
829  
830  
831  
832  
833  
834  
835  
836  
837  
838  
839  
840  
841  
842  
843  
844  
845  
846  
847  
848  
849  
850  
851  
852  
853  
854  
855  
856  
857  
858  
859  
860  
861  
862  
863  
864  
865  
866  
867  
868  
869  
870  
871  
872  
873  
874  
875  
876  
877  
878  
879  
880  
881  
882  
883  
884  
885  
886  
887  
888  
889  
890  
891  
892  
893  
894  
895  
896  
897  
898  
899  
900  
901  
902  
903  
904  
905  
906  
907  
908  
909  
910  
911  
912  
913  
914  
915  
916  
917  
918  
919  
920  
921  
922  
923  
924  
925  
926  
927  
928  
929  
930  
931  
932  
933  
934  
935  
936  
937  
938  
939  
940  
941  
942  
943  
944  
945  
946  
947  
948  
949  
950  
951  
952  
953  
954  
955  
956  
957  
958  
959  
960  
961  
962  
963  
964  
965  
966  
967  
968  
969  
970  
971  
972  
973  
974  
975  
976  
977  
978  
979  
980  
981  
982  
983  
984  
985  
986  
987  
988  
989  
990  
991  
992  
993  
994  
995  
996  
997  
998  
999  
1000

The optimal stringency parameters (with a similarity and length fraction = 0.8) were used to map the 25,206,510 Illumina reads to the set of full-length *Potentilla* REs identified. A total of 6,641,881 reads, corresponding to 26.35% of the genome, mapped to the full-length REs characterised. Of these, 2,775,736 (11.01%) mapped to *Copia* REs, whilst 3,727,713 (14.79%) mapped to *Gypsy* REs, and the remaining 138,432 (0.55%) mapped to unidentified LTR-REs. The mapping of the different RE lineages is summarised in Additional File 2: Fig. S3. The analysis revealed that the *Ogre/TAT Gypsy* lineage was by far the most redundant in *P. micrantha*, whilst amongst the *Copia* retrotransposons, the *Bianca* lineage was the most represented. The majority of full-length elements, that could be considered as sublineages, showed low numbers of mapped reads, with only *Bianca* and *Ogre/TAT* lineages showing an abundance of highly redundant elements (Additional File 2: Fig. S4).

For RE insertion age determination, the mean synonymous substitution rate between *P. micrantha* and *F. vesca*, was estimated by comparing 50 orthologous genes, which equated to 52,703 bp of aligned sequences between the two species, resulting to be 0.064 synonymous substitutions per site ( $K_s$ ). Using a timescale of 24.22 million years since the separation of *P. micrantha* and *F. vesca*, and

1 a  $K_s$  of 0.064, the resulting synonymous substitution rate was  $2.64 \times 10^{-9}$  substitutions per year. As  
2 mutation rates for LTR retrotransposons have been estimated to be approximately two-fold higher  
3 than silent site mutation rates for protein coding genes (SanMiguel and Bennetzen 1998; Ma and  
4 Bennetzen 2004), a substitution rate per year of  $5.28 \times 10^{-9}$  was used in calculations of LTR-RE  
5 insertion dates. When the whole set of usable retrotransposons was taken into account, the nucleotide  
6 distance (K) between sister LTRs showed a large degree of variation between retro-elements, ranging  
7 from 0 to 0.124 using the Kimura two parameter method, which represents a time span of at most  
8 23.54 million years. The putative mean age of analysed LTR-REs is 7.42 million years, with a  
9 standard deviation of 4.11 million years. The distribution of full-length LTR-REs according to their  
10 putative insertion date is reported in Fig. 8. Analysis of the insertion date profiles suggested different  
11 transposition waves between *Gypsy* and *Copia* elements (Fig. 8), with peaks of retrotransposition by  
12 *Gypsy* and *Copia* elements alternating, and *Gypsy* elements being on average older than *Copia*  
13 elements. The mean insertion dates of the most numerous *Gypsy* and *Copia* lineages show that  
14 different lineages underwent amplification in different timespans (Additional File 2: Fig. S5), with  
15 *Ivana*, *AleI/Retrofit*, and *Bianca* elements being significantly younger than *Ogre/TAT*  
16 retrotransposons, suggesting specific activation bursts for the different lineages.

### 17 **Hormonal treatment of emasculated *Potentilla micrantha* flowers**

18 Expansion of unfertilized flower receptacles of *F. vesca* flowers was observed following treatment  
19 with either naphthaleneacetic acid (NAA) or gibberellic acid (GA3) in isolation and in combination  
20 as reported previously by Kang et al. (2013) [8]. Unfertilized receptacle expansion was also observed  
21 following treatment of *F. vesca* flowers with N-1-naphthylphthalamic acid (NPA). In contrast, no  
22 expansion of tissues was observed when the unfertilized receptacles of *P. micrantha*, *P. indica* or *P.*  
23 *reptans* were treated with either NAA or GA3 in isolation or in combination, or with NPA.

## 24 **DISCUSSION**

1 In this investigation, the genome of *P. micrantha*, a member of the Rosaceae, a diverse family of  
2 fruiting perennial plant genera, was sequenced using both short-read Illumina and long-read PacBio  
3 sequence data, and the resulting data was assembled into a highly contiguous reference sequence for  
4 the genus *Potentilla*. The genome was shown here to be one of the most homozygous plant genomes  
5 sequenced to date, more homozygous than that of the fourth generation inbred line of *F. vesca*  
6 ‘Hawaii 4’ used to produce the reference sequence for *Fragaria* [9] and that of the predominantly  
7 selfing *R. occidentalis* [21], the two closest sequenced relatives of *P. micrantha*. PacBio data (using  
8 early iterations of the sequencing chemistry) were proficiently integrated with short-reads,  
9 significantly improving the contiguity of the assembly; however the PacBio throughput was not  
10 sufficient to permit independent *de novo* assembly. Nonetheless, whilst fragmented, the genome and  
11 sequence presented here have a quality similar to the *F. vesca* genome, containing significantly fewer  
12 un-sequenced gaps within scaffolds, and is far more contiguous than that of *R. occidentalis* [21].  
13 Along with the set of gene predictions presented, it represents a valuable resource for studying the  
14 genetic basis of a number of key morphological traits that differ between *P. micrantha* and its closest  
15 sequenced relatives.

16 *Potentilla* has been shown previously to be the genus most closely related to *Fragaria* [2], with some  
17 authors advocating for the inclusion of *Fragaria* within the *Potentilla* genus [22]. Despite their  
18 closeness, we show in this work that the genome of *P. micrantha* is 59.6% larger than that of *F. vesca*,  
19 and it is also larger than the available genomes of the other Fragariinae i.e. *Rubus* [23,24] and *Rosa*  
20 species [25,26]. *Potentilla* and *Fragaria* are separated by just 24.22 million years of evolution [3]  
21 and this investigation demonstrated that *P. micrantha* and *F. vesca* exhibit a remarkable degree of  
22 synteny of the coding genome, with the main differences being short-range inversions. Nonetheless,  
23 the apparent differences in insertion age of transposable elements in the two genomes has led to  
24 significant differences in the repetitive portions. Whereas the genome structure of *P. micrantha* is  
25 similar to that of most angiosperm species [27], with a repetitive component amounting to around

1 41.5% of the total genome content, the genome of *F. vesca* has been previously demonstrated to  
2 contain just 22% repetitive elements [9].  
3  
4 3 It has been shown previously that the activity of retrotransposons is a primary mechanism underlying  
5 the remarkable diversity in genome size of plant species [28,29]. The comparative hybrid clustering  
6 analysis of *P. micrantha* and *F. vesca* presented here highlighted the significant diversification  
7 between the repetitive component of the genomes of the two species, with just 25 of the 291 repeat  
8 clusters similarly represented in the two species, the majority of which correspond to ribosomal DNA.  
9  
10 5 Contrary to the coding or non-repetitive genome, the repetitive fractions of the *P. micrantha* and  
11 *F. vesca* genomes are highly diversified, suggesting that the overwhelming majority of  
12 retrotransposon activity in the genus *Potentilla* occurred after the divergence of the two genera from  
13 their common progenitor. Recent sequencing and analysis of the *F. iinumae* genome [30] has shown  
14 that members of *Fragaria* share largely similar genome sizes at the diploid level; the flow cytometry  
15 data presented here suggests likewise that *Potentilla* species have genomes that are significantly  
16 larger with respect to *Fragaria spp.* As such, the data presented here strongly indicate that  
17 retrotransposon activity (or the lack thereof in the genus *Fragaria*) is responsible for the significant  
18 difference between the genome size of *Fragaria* and its closest relatives, and support the assertion  
19 of Potter et al. (2007) [2] that *Fragaria* should be treated as a distinct genus, separate from *Potentilla*.  
20  
21 In *Fragaria*, the low copy number of LTR retrotransposon elements has recently been attributed to a  
22 mechanism based on the very high abundance and ubiquitous expression of miRNA 1511, which  
23 specifically targets and cleaves LTR retrotransposon transcripts at the primer binding site [31]. This  
24 miRNA is generated from a single pre-miR locus in the *Fragaria* genome which, like other pre-miR  
25 loci, is considered to be pol II transcribed. Although the miR1511 pre-miR hairpin is present in the  
26 *Potentilla* genome, the adjacent upstream sequences harbor mismatches and multiple in/dels (data not  
27 shown) implying the possibility that the expression of the locus may be different between the two  
28 species and opening an intriguing question of the role that this defense mechanism could have played  
29 in speciation within this clade.



1 LTR-retrotransposons dynamics are thought to be involved in important genome function, such as  
2 restructuring, providing promoter and enhancer activity to genes, and playing a major role in the  
3 epigenetic settings of the genome, hence regulating both chromatin organisation and gene expression  
4 [32–34]. Differences in the retrotransposon component between *P. micrantha* and *F. vesca* could  
5 therefore have contributed to the phenotypic diversification of these species, as well as the evolution  
6 of genome size.

7 MADS-box transcription factors have been implicated in a wide and extremely diverse array of  
8 developmental processes in plants [35], and were initially demonstrated to play a major role in floral  
9 organ differentiation, including gametophyte, embryo and seed development, as well as flower and  
10 fruit development. A study of the differential expression of MADS-box genes revealed three clades  
11 of orthologous genes where gene expression of orthologous genes was up-regulated in *F. vesca* with  
12 respect to *P. micrantha*. One clade contained genes that were homologous to AGL36, a transcription  
13 factor crucial for endosperm differentiation and development [18,36]. Another clade contained genes  
14 homologous to *A. thaliana* AGL62, which likewise has been implicated in embryo development, and  
15 is thought to have an essential role of endosperm cellularization for viable seed formation [19]. The  
16 third clade contained genes homologous to AGL15 reported to have diverse roles in embryogenesis,  
17 fruit maturation, seed desiccation and the repression of floral transition [20,37], as well as being a  
18 positive regulator of the expression of mir156, a repressor of floral transition [38].

19 The diversity of fruit forms in the Rosaceae family has prompted the suggestion that comparative  
20 analyses of genome organization and gene expression during fruit development in different genera  
21 within the family will lead to a deeper understanding of the evolution of fruit as a mode of seed  
22 dispersal in flowering plants. The set of genomics tools developed here for a non-fruitlet relative of  
23 *F. vesca*, including a genome sequence, gene predictions and RNA-Seq data is a valuable  
24 foundational resource for more detailed studies of fleshy receptacle or berry development in  
25 strawberry, and will help illuminate further studies of fruit development in the family as a whole.  
26 Further work will need to be performed to characterize candidate genes from those differentially

1 expressed between *P. micrantha* and to elucidate their roles in the development of fleshy  
2 fruit/accessory berries in the genus *Fragaria*.

## 7 4 **METHODS**

### 10 5 **Plant material, flow cytometry and DNA isolation**

12 6 A specimen of *Potentilla micrantha* was collected from Avala, Serbia in spring 2012 and  
13 subsequently used for sequencing. The plant was maintained in a growth room at a constant  
14 7 temperature of 24 degrees during the day and 18 degrees at night, with a 16-hour photoperiod to  
15 8 encourage new shoot development. Young leaves were harvested and subjected to flow cytometry by  
16 9 Plant Cytometry Services, NL. Measurements were taken in triplicate against a *Vicia minor* internal  
17 10 standard using the propidium iodide fluorescent dye. The *F. vesca* accession ‘Hawaii 4’ for which a  
18 11 whole genome sequence has been published [9] was analyzed for comparison. Prior to harvesting leaf  
19 12 material for DNA extraction, the plant was moved to a darkened growth chamber for 120 hours,  
20 13 maintaining a constant temperature of 22 degrees. DNA was extracted from young, unexpanded leaf  
21 14 material using the modified CTAB extraction protocol of Chen and Ronald (1999) [39], quantified  
22 15 using a Nanodrop spectrophotometer and Qubit fluorometer, and assessed for integrity by agarose gel  
23 16 electrophoresis against a  $\lambda$  *HindIII* size standard.

24 17 Since *P. micrantha* does not reproduce asexually from runners, a seedling population obtained from  
25 18 the selfing of the original mother plant was maintained from which to harvest tissue from stages of  
26 19 floral and fruiting development. Flowers of *P. micrantha* and *F. vesca*, along with two other  
27 20 *Potentilla* species, *P. reptans* and *P. indica* were treated with naphthaleneacetic acid (NAA; Sigma-  
28 21 Aldrich), N-1-naphthylphthalamic acid (NPA; Sigma-Aldrich), gibberellic acid (GA3; Sigma-  
29 22 Aldrich) and a combination of NAA and NPA, following the methods of Kang et al. (2013) [8].  
30 23 Briefly, stock solutions of 50 mM NAA, 50mM NPA, and 100mM GA3 were made in ethanol and  
31 24 diluted with two drops of Tween 20 and water before application. The final treatment concentrations

1 were 500  $\mu$ M for NAA and GA3 and 100  $\mu$ M for NPA. 50 ml of hormone solution was pipetted onto  
2 the receptacle of each emasculated flower every two days for twelve days.  
3  
4  
5 3  
6

#### 7 4 **Tissue sampling, RNA extraction and sequencing**

8

9 5 Tissues from five stages of flowering and ‘fruit’ development were harvested from untreated flowers  
10 in biological duplicates or triplicates for RNA isolation. The stages of flowering followed those  
11 identified in *Fragaria* by Kang et al. (2013) [8], with the addition of a stage 0 (unopened flowers)  
12 and young unexpanded leaf tissue. The selected developmental stages are shown in Fig. 3. RNA was  
13 extracted from 50 mg of snap-frozen tissue from each developmental stage using the Spectrum plant  
14 total RNA extraction kit (Sigma) with an on-column DNase I digestion (Sigma) step. The extraction  
15 protocol followed the manufacturers’ recommendations with two minor modifications: 1% PVP was  
16 added to the lysis solution, and the number of washes at each stage was doubled (i.e. two washes were  
17 performed with wash solution 1 and four washes were performed with wash solution 2). The RNA  
18 extracted from each sample was diluted in 50  $\mu$ l of elution solution (Sigma). Following elution, total  
19 RNA was quantified using a Nanodrop spectrophotometer and Qubit fluorometer and assessed for  
20 integrity using a Bioanalyzer (Agilent). Samples returning a RIN value greater than 7.5 were  
21 considered acceptable for sequencing. A total of 12 Illumina TruSeq libraries were constructed from  
22 2  $\mu$ g of total RNA. Libraries were made from the following samples; one from stage 0, two from  
23 stage 1, two from stage 2, three from stage 3 and three from stage 4. A final library was made from  
24 RNA of young leaf tissue. The libraries were sequenced in triplex per single lane of Illumina  
25 HiSeq2000. Samples were indexed and multiplexed, and then 101 bp paired-end sequencing was  
26 performed using the Illumina HiSeq 2000 platform at the Weill Medical core genomics facility of  
27 Cornell University.  
28  
29  
30  
31  
32  
33  
34  
35  
36  
37  
38  
39  
40  
41  
42  
43  
44  
45  
46  
47  
48  
49  
50  
51  
52  
53  
54  
55  
56  
57  
58  
59  
60  
61  
62  
63  
64  
65

#### 60 **Whole genome shotgun sequencing, assembly**

61  
62  
63  
64  
65

1 A strategy following the ALLPATHS-LG protocol was followed to produce an initial assembly using  
2 second-generation sequence data. Five Nextera sequencing libraries were developed and sequenced  
3  
4 on the Illumina HiSeq2000 sequencing platform. The libraries were an Illumina paired-end  
5  
6 overlapping fragment library (OLF) with an insert size of 170 bp, and four Illumina mate-pair (MP)  
7  
8 libraries of 3 kb, 5 kb, 8 kb and 12 kb. The OLF library was created using the Illumina Nextera library  
9  
10 preparation kit following the manufacturers' recommendations and was sequenced in simplex on a  
11  
12 single lane of Illumina HiSeq2000, whilst the MP libraries were prepared using the Illumina Mate  
13  
14 Pair Library v2 kit following the manufacturers' recommendations and were subsequently sequenced  
15  
16 in duplex. All sequencing was performed at the Weill Medical Centre core genomics facility at  
17  
18 Cornell University. ALLPATHS-LG [40] was run using the sequencing libraries described above  
19  
20 using default settings. Subsequently, a selection of SMRT-bell sequencing libraries were constructed  
21  
22 using various versions of the PacBio RS sequencing kits and chemistries (Additional File 1: Table  
23  
24 S2) and PBJelly [17] running default settings was used to incorporate data generated using the PacBio  
25  
26 RS platform (Pacific Biosciences) into the ALLPATHS-LG Illumina assembly scaffolds.  
27  
28  
29  
30  
31  
32  
33  
34  
35

### 36 **Gene prediction, annotation, determination of gene orthology and evaluation of synteny** 37 38 39 **between *Potentilla* and *Fragaria* genomes** 40

41 First, *ab initio* repeat finding was done with RepeatModeler [41] that was run on the complete set of  
42  
43 genomic scaffolds set and a repeat library was created. Next, the genome was masked using  
44  
45 RepeatMasker [42]. Gene prediction was done with GeneMark-ET [43]. The following parameters  
46  
47 were used; a minimum scaffold length of 10 kb, a maximum scaffold gap size of 40 kb, a minimum  
48  
49 intron size of 50 bp, a maximum intron length of 10 kb and a maximum intergenic length of 50 kb.  
50  
51  
52 RNA-seq reads from the 12 libraries were aligned to the genome sequence scaffolds using the STAR  
53  
54 tool with default parameters [44]. Reads from the 12 RNA-seq datasets were aligned to the genome.  
55  
56  
57 Mapping of RNA-seq reads that included intron junctions led to the identification of introns. Introns  
58  
59 with a high 'intron score' (identified by more than 60 RNAseq reads) were considered to be reliably  
60  
61  
62  
63  
64  
65

1 identified. Predicted genes were annotated using BLAST2GO [45]. The non-redundant NCBI protein  
2 database was downloaded and BLAST was run locally. Results from the BLAST analysis were  
3  
4  
5 3 uploaded to the BLAST2GO server and gene ontology analyses were performed using default  
6  
7 4 parameters.

8  
9  
10 5 Orthologous relationships between *Fragaria* and *Potentilla* genes was determined through sequence  
11  
12 6 clustering performed using Inparanoid 7 [46]. Analyses were based only on homology, as an  
13  
14 7 alternative to the more stringent ortholog classification. *Prunus persica* v2.0.a1 predicted proteins  
15  
16  
17 8 downloaded from the GDR [47] and *Potentilla micrantha* and *Fragaria vesca* protein sequences were  
18  
19 9 blasted all against all and the output file was filtered at the following thresholds: maximum E-  
20  
21  
22 10 value= $10^{-4}$  and query coverage of at least 50%. The resulting file was used as an input to the MCL  
23  
24 11 algorithm using as edge weight  $-\log_{10}(\text{evalue})$  (all E-values=0 were changed to 1E-300). To explore  
25  
26  
27 12 more thoroughly the homology network used as input, the MCL algorithm was run at different  
28  
29 13 granularity levels (inflation parameter equal to 1.5, 1.7, 2.0, 2.3, 2.4, 2.7, 3) and then a table indicating  
30  
31  
32 14 cluster memberships at the different stringencies was compiled for each node. Ortholog classification  
33  
34 15 was produced using Inparanoid 7 [46] for pairs of species in all combinations. The resulting sqltables  
35  
36 16 were then used as an input for QuickParanoid (<http://pl.postech.ac.kr/QuickParanoid/>) and the  
37  
38  
39 17 sequences were combined in a three-species ortholog classification. The clusters obtained with  
40  
41 18 QuickParanoid were used to calculate the number of genes contained in each cluster for both  
42  
43  
44 19 *Potentilla* and *Fragaria*.

45  
46 20 *Potentilla* gene predictions were used as queries to identify the physical locations of orthologous  
47  
48  
49 21 sequences on the *F. vesca* v2.0 pseudomolecules. Since the *Potentilla* genomic scaffolds were not  
50  
51 22 oriented and ordered against a reference genetic map, conservation of synteny between the *Potentilla*  
52  
53  
54 23 and *Fragaria* genomes was determined through a comparison of the physical positions of orthologous  
55  
56 24 gene sequences on the sequence scaffolds of *Potentilla* and the pseudomolecules of *Fragaria*. Criteria  
57  
58 25 for the identification of syntenic regions followed that of Jung et al (2012). No attempt was therefore  
59  
60  
61 26 made to infer macro-syntenic structure on a chromosome scale between the two genomes.

## Gene expression during stages of fruit development in *Potentilla micrantha* and *Fragaria vesca*

The quality of the raw reads generated as described above was checked with FastQC [48]; Trimmomatic [49] was used to remove adapter sequences. The *F. vesca* .sra files [8] were used to compare gene expression in *Fragaria* with *Potentilla*; *Fragaria* reads from the same developmental stage were merged and treated as a single data set since data from *Potentilla* was not generated from individual floral organs. The 12 trimmed *P. micrantha* RNA-seq libraries were mapped on the *P. micrantha* gene prediction CDs, while the ten *F. vesca* sets were mapped to the *F. vesca* v1.0 gene prediction CDs [9] downloaded from the GDR [47] using Bowtie2 [50] and default settings. The number of reads mapping to each gene for each RNA set was calculated from the .sam alignment files derived from Bowtie2.

Counts of RNA-seq reads over transcripts were used to calculate the gene expression level in  $FPKM=10^9 \cdot ER / (EL \times MR)$ , where ER was the number of mapped reads in the exons of a particular gene, EL was the sum of exon length in base pairs, and MR was the total number of mapped reads [51]. FPKM was used to distinguish expressed genes from inactive genes during the flower development in each species. FPKM was used to define a set of highly expressed genes. Genes were considered as 'highly-expressed' if  $FPKM > 1000$ . Genes that returned an  $FPKM < 1000$  in all samples were removed from further analysis. The remaining genes were processed by performing a linear rescaling of the  $\log_2$ -counts, aligning the distributions for every sample at their distribution modes, followed by variance stabilization to ensure homoscedasticity. A one-way ANOVA was performed gene-by-gene on the rescaled  $\log_2$ -counts to detect changes in expression among different developmental phases. Differentially expressed genes (DEGs) were selected by setting cutoffs both on the p-values from the ANOVA F-tests, as well as on the magnitude of observed changes represented by the square root of the ANOVA MSR values (equivalent to using volcano plots for two-condition studies). Genes were considered differentially expressed if the  $\sqrt{MSR} > 2.00$  and  $p\text{-value} < 10^{-3}$ .

1  
1  
2 **Phylogenetic and functional analysis of MADs-box domain-containing genes and gene**  
3  
4  
5 **expression profile mapping**  
6

7 Protein sequences of *Potentilla* (this publication) and *Fragaria* (Fvesca\_v1.0\_hybrid;  
8  
9 [www.rosaceae.org](http://www.rosaceae.org)) were analysed on the NCBI conserved domain database [52]. All proteins  
10  
11 containing a MADs-box domain were retrieved and the MADs-box extracted with Bedtools getfasta  
12  
13 [53] using default parameters. An initial sequence alignment was carried out using ClustalW and  
14  
15 pairwise distances were calculated to eliminate outliers. A total of 16 sequences were removed from  
16  
17 further analysis since they were too short and possessed incomplete N-terminal ends, indicating they  
18  
19 were likely pseudogenes. The alignment used for phylogenetic analysis was constructed with SATé-  
20  
21 II [54] and contained 156 protein sequences (75 from *Potentilla* and 81 from *Fragaria*).  
22  
23

24 Three methods, Maximum Likelihood, Maximum Parsimony and Neighbour-joining, each with 1,000  
25  
26 bootstrap replicates were employed for phylogenetic reconstruction of the MADs-box domain  
27  
28 containing genes using Mega 7.0.14 [55]. Where missing data was present in the alignment, deletion  
29  
30 of columns containing a fraction of missing data above 10% and 30% was performed for ML and MP  
31  
32 methods. Pairwise deletion was instead used in the case of NJ, to maximise the phylogenetic  
33  
34 information retained in the alignment. The Maximum Likelihood topology was used as reference for  
35  
36 further analysis.  
37  
38

39 The expression profiles of the genes containing a MADs-box were used to decorate the phylogenetic  
40  
41 tree using iTOL v2 [56], allowing the identification of orthologous MADs-box gene pairs displaying  
42  
43 differential gene expression profiles between *Potentilla* and *Fragaria*. Curated annotation of  
44  
45 differentially expressed putative gene function was carried out using BLASTp homology searches of  
46  
47 the TAIR database [57].  
48  
49  
50  
51  
52  
53  
54  
55

56  
57  
58 **Analysis of the repetitive component of *Potentilla* genome**  
59

60 To identify and characterize genomic repeats in the *P. micrantha* genome, a reduced set of 2,000,000  
61  
62  
63  
64  
65

1 randomly selected genomic Illumina reads, corresponding to 0.57× of the *P. micrantha* genome were  
2 subjected to clustering using RepeatExplorer [58]. Among the clusters produced, the top clusters,  
3 with a genome proportion higher than 0.01%, were annotated using 0.2 as cutoff for cluster  
4 connection through mates. Clusters that were annotated as similar to phi-X174 were removed as  
5 contaminants. The output of RepeatExplorer was also used to prepare an in-house library containing  
6 all contigs belonging to clusters annotated by RepeatExplorer as long terminal repeat retrotransposons  
7 (LTR-REs) by similarity search against RepBase [59]. Subsequently, pairwise hybrid clustering  
8 between a random set of 1,431,114 Illumina reads derived from *P. micrantha* genomic DNA and  
9 1,090,102 *F. vesca* genomic reads, each corresponding to 0.41× of the respective genomes was  
10 performed using RepeatExplorer [58].

### 11 ***Potentilla* full-length LTR-RE characterization**

12 LTR-FINDER [60] was used to isolate putative full-length LTR-REs from 280 randomly-selected  
13 *Potentilla* genome sequence scaffolds and alignment boundaries were obtained by adjusting the ends  
14 of LTR-pair candidates using the Smith–Waterman algorithm. These boundaries were re-adjusted  
15 based on the occurrence of the following typical LTR-RE features: (a) the putative LTR-RE were  
16 flanked by the dinucleotides TG and CA at 5′ and 3′ ends respectively; (b) a target-site duplication  
17 (TSD) of 4–6 nt in length was present in the sequence; (c) a putative 15–18 nt primer binding site  
18 (PBS) complementary to a tRNA at the end of the putative 5′-LTR was present in the sequence; and  
19 (d) a 20–25-nt polypurine tract (PPT) just upstream of the 5′ end of the 3′ LTR was present in the  
20 sequence. Putative LTR-REs were manually validated using DOTTER [61], verifying the occurrence  
21 of LTRs, dinucleotides TG and CA at the 5′ and 3′ ends respectively, and TSDs. The validated LTR-  
22 REs were annotated using BLASTX and BLASTN querying the NCBI nr nucleotide and protein  
23 NCBI databases and RepBase [59]. To limit false-positive detection, a fixed E-value threshold of E  
24 < 10<sup>-5</sup> for BLASTN and E < 10<sup>-10</sup> for BLASTX was used. The full-length elements identified were  
25 analysed using RepeatExplorer [58], performing searches for GAG, protease, retrotranscriptase,  
26



1 RNaseH, integrase, and chromodomain derived from plant protein domains from RepBase. The  
2 similarity search was filtered at E-value  $< 10^{-10}$ , allowing for both mismatches and frameshifts. The  
3  
4 same tool was used to assign full-length elements to specific *Gypsy* or *Copia* lineages. Full-length  
5  
6 LTR-REs that were identified as belonging to *Gypsy* or *Copia* superfamilies, and clusters annotated  
7  
8 as LTR-retrotransposons by RepeatExplorer (see above) were then used as reference datasets for  
9  
10 further searches in order to identify previously unclassified elements using RepeatMasker, running  
11  
12 default parameters, but with -div set to 20.  
13  
14  
15  
16 For determination of RE redundancy, approximately 32,000,000 randomly-selected raw *Potentilla*  
17  
18 Illumina paired end reads, corresponding to 10.3× genome coverage. After removal of organellar  
19  
20 contamination performed by mapping the reads to an in-house Rosaceae organellar database and the  
21  
22 removal of duplicate reads, a total of 25,206,510 filtered nuclear reads corresponding to 7.2×  
23  
24 equivalent genomic coverage were used for redundancy analysis by mapping the reads to all REs  
25  
26 characterized in the *Potentilla* genome using CLC-BIO Genomic Workbench 8.0 (CLC-BIO, Aarhus,  
27  
28 Denmark). Mismatch cost, deletion cost, and insertion cost were fixed at 1, and similarity and length  
29  
30 fraction were both fixed at 0.9, 0.8, 0.5 or 0.4 to obtain high, medium, low, or very low stringencies,  
31  
32 respectively. As reads that mapped to multiple distinct sequences were few, and distributed randomly  
33  
34 throughout the dataset, the number of reads mapping to each RE was taken as the degree of  
35  
36 redundancy of that sequence within the genome. The effective abundance of a particular class of reads  
37  
38 was calculated as the proportion of the total number of reads mapped in each class, with respect to  
39  
40 the overall number of genomic reads mapped, using optimal stringency parameters, i.e. where further  
41  
42 relaxation of stringency did not significantly increase the number of mapped reads.  
43  
44  
45  
46  
47  
48  
49  
50 The abundance of each single RE sequence in the genome was analysed by mapping *Potentilla* DNA  
51  
52 reads, corresponding to 2× genome coverage to the full-length REs characterised, one by one using  
53  
54 BWA (alignment via Burrows–Wheeler transformation) version 0.7.5a-r405 [62] running the  
55  
56 following parameters: bwaaln -t 4 -l 12 -n 4 -k 2 -o 3 -e 3 -M 2 -O 6 -E 3. The resulting single-end  
57  
58 mappings were resolved via the samse module of BWA, and the output was converted to .bam file  
59  
60  
61  
62  
63  
64  
65

1 format using SAMtools version 0.1.19 [63]. Subsequently, SAMtools was used to calculate the  
2 number of mapped reads for each alignment using the following parameters: samtools view -c -F 4.  
3  
4

#### 7 **Determination of RE insertion age**

8  
9  
10 5 Retrotransposon insertion age was estimated through a sequence divergence comparison of the 5'-  
11 and 3'-LTRs of each putative full-length retrotransposon. Synonymous substitution rates were  
12 6 calculated for 50 pairs of orthologous gene sequences of *P. micrantha* and *F. vesca*, using a time of  
13 7 divergence of 24.22 million years [3]. Subsequently, the two LTRs were aligned with ClustalX  
14 8 software [64], indels were eliminated, and the number of nucleotide substitutions was counted using  
15 9 DnaSP [65] for each retrotransposon. The insertion times of retrotransposons with both LTRs were  
16 10 dated using the Kimura two parameter (K2P) method [66], calculated using DnaSP, and a  
17 11 synonymous substitution rate that is twofold that calculated for genes [67,68].  
18 12  
19 13  
20 14  
21 15  
22 16  
23 17  
24 18  
25 19  
26 20  
27 21  
28 22  
29 23  
30 24  
31 25  
32 26  
33 27  
34 28  
35 29  
36 30  
37 31  
38 32  
39 33  
40 34  
41 35  
42 36  
43 37  
44 38  
45 39  
46 40  
47 41  
48 42  
49 43  
50 44  
51 45  
52 46  
53 47  
54 48  
55 49  
56 50  
57 51  
58 52  
59 53  
60 54  
61 55  
62 56  
63 57  
64 58  
65 59

#### 31 **AVAILABILITY OF SUPPORTING DATA AND MATERIALS**

32 14 The data set supporting the results of this article are available in the GenBank repository, project  
33 34  
34 35  
35 36  
36 37  
37 38  
38 39  
39 40  
40 41  
41 42  
42 43  
43 44  
44 45  
45 46  
46 47  
47 48  
48 49  
49 50  
50 51  
51 52  
52 53  
53 54  
54 55  
55 56  
56 57  
57 58  
58 59  
59 60  
60 61  
61 62  
62 63  
63 64  
64 65  
65 66

#### 43 **FUNDING**

44 19 This work was funded by a grant to the Fondazione Edmund Mach (FEM) from the Autonomous  
45 46  
46 47  
47 48  
48 49  
49 50  
50 51  
51 52  
52 53  
53 54  
54 55  
55 56  
56 57  
57 58  
58 59  
59 60  
60 61  
61 62  
62 63  
63 64  
64 65  
65 66

#### 56 **CONFLICT OF INTERESTS**

1 The authors declare no competing interests.

1  
2  
3  
4  
5  
6  
7  
8  
9  
10  
11  
12  
13  
14  
15  
16  
17  
18  
19  
20  
21  
22  
23  
24  
25  
26  
27  
28  
29  
30  
31  
32  
33  
34  
35  
36  
37  
38  
39  
40  
41  
42  
43  
44  
45  
46  
47  
48  
49  
50  
51  
52  
53  
54  
55  
56  
57  
58  
59  
60  
61  
62  
63  
64  
65

### AUTHOR CONTRIBUTIONS

M.Buti performed the experiments, analysed and interpreted all data and authored the paper. M.M., P.S. and A.C. analysed sequence data and performed genome assemblies. K.E. and M. Brillì assisted with experimental design, analysed and interpreted gene expression data and commented on and contributed to the manuscript. L.N. and A.C. performed full-length retrotransposon isolation. E.B., F.M. and A.C. performed clustering, annotation and redundancy analyses of repetitive sequences. E.B., F.M., L.N. and A.C. participated in the interpretation and discussion of results and contributed to the writing of the paper. A.L and M.Borodovsky performed gene predictions and analysed and interpreted the data. L.G., N.Š. assisted with experiments, interpreted data and contributed to the manuscript. M.A. and J.W. assisted with genome assemblies and gene annotation. C.V. analysed and interpreted phylogenetic data and contributed to the manuscript. R.V. commented on the manuscript. D.J.S. designed the study, assisted with the experiments, analysed and interpreted the data and authored the paper.

### ADDITIONAL FILES

Additional File 1: Table S S1 to S19

Additional File 2: Figures S1 to S7

Supplementary Excel File 1: Contig sizes and number of orthologous genes identified in each contig of *Potentilla micrantha* genome

### REFERENCES

1. Eriksson T, Donoghue MJ, Hibbs MS. Phylogenetic analysis of *Potentilla* using DNA sequences of nuclear ribosomal internal transcribed spacers (ITS), and implications for the classification of Rosoideae (Rosaceae). *Plant Syst. Evol.* [Internet]. Springer-Verlag; 1998 [cited 2016 Aug

- 1 9];211:155–79. Available from: <http://link.springer.com/10.1007/BF00985357>
- 2 2. Potter D, Eriksson T, Evans RC, Oh S, Smedmark JEE, Morgan DR, et al. Phylogeny and  
3  
4 classification of Rosaceae. *Plant Syst. Evol.* [Internet]. 2007 [cited 2015 Oct 3];266:5–43. Available  
5 3  
6 from: <http://link.springer.com/10.1007/s00606-007-0539-9>
- 7 4  
8  
9 3. Njuguna W, Liston A, Cronn R, Ashman T-L, Bassil N. Insights into phylogeny, sex function  
10 5  
11 and age of *Fragaria* based on whole chloroplast genome sequencing. *Mol. Phylogenet. Evol.*  
12 6  
13 2013;66:17–29.
- 14 7  
15  
16 4. Dreher T, Poovaiah B. Changes in auxin content during development in strawberry fruits. *J. Plant*  
17 8  
18 *Growth Regul.* 1982;1:276.
- 19 9  
20  
21 5. Aharoni A, O’Connell AP. Gene expression analysis of strawberry achene and receptacle  
22 10  
23 maturation using DNA microarrays. *J. Exp. Bot.* [Internet]. Oxford University Press; 2002 [cited  
24 11  
25 2016 Aug 10];53:2073–87. Available from:  
26 12  
27 <http://jxb.oxfordjournals.org/lookup/doi/10.1093/jxb/erf026>
- 28  
29 13  
30  
31 6. García-Gago JA, Posé S, Muñoz-Blanco J, Quesada MA, Mercado JA. The polygalacturonase  
32 14  
33 FaPG1 gene plays a key role in strawberry fruit softening. *Plant Signal. Behav.* [Internet]. Landes  
34 15  
35 *Bioscience*; 2009 [cited 2016 Aug 10];4:766–8. Available from:  
36 16  
37 <http://www.ncbi.nlm.nih.gov/pubmed/19820312>
- 38  
39 17  
40  
41 7. Symons GM, Chua Y-J, Ross JJ, Quittenden LJ, Davies NW, Reid JB. Hormonal changes during  
42 18  
43 non-climacteric ripening in strawberry. *J. Exp. Bot.* [Internet]. Oxford University Press; 2012 [cited  
44 19  
45 2016 Aug 10];63:4741–50. Available from: <http://www.ncbi.nlm.nih.gov/pubmed/22791823>
- 46 20  
47  
48 8. Kang C, Darwish O, Geretz A, Shahan R, Alkharouf N, Liu Z. Genome-Scale Transcriptomic  
49 21  
50 Insights into Early-Stage Fruit Development in Woodland Strawberry *Fragaria vesca*. *Plant Cell*  
51 22  
52 [Internet]. 2013;25:1960–78. Available from:  
53 23  
54 <http://www.plantcell.org/cgi/doi/10.1105/tpc.113.111732>
- 55  
56 24  
57  
58 9. Shulaev V, Sargent DJ, Crowhurst RN, Mockler TC, Folkerts O, Delcher AL, et al. The genome  
59 25  
60 of woodland strawberry (*Fragaria vesca*). *Nat. Genet.* [Internet]. 2011 [cited 2016 Aug 8];43:109–  
61 26  
62  
63  
64  
65

- 1 16. Available from: <http://www.ncbi.nlm.nih.gov/pubmed/21186353>
- 2 10. Jung S, Cestaro A, Troglio M, Main D, Zheng P, Cho I, et al. Whole genome comparisons of  
3  
4  
5 3 Fragaria, Prunus and Malus reveal different modes of evolution between Rosaceous subfamilies.  
6  
7 4 BMC Genomics [Internet]. 2012 [cited 2016 Aug 8];13:129. Available from:  
8  
9  
10 5 <http://www.ncbi.nlm.nih.gov/pubmed/22475018>
- 11  
12 6 11. Koenig D, Jimenez-Gomez JM, Kimura S, Fulop D, Chitwood DH, Headland LR, et al.  
13  
14 7 Comparative transcriptomics reveals patterns of selection in domesticated and wild tomato. Proc.  
15  
16  
17 8 Natl. Acad. Sci. [Internet]. National Academy of Sciences; 2013 [cited 2016 Aug 8];110:E2655–62.  
18  
19 9 Available from: <http://www.pnas.org/cgi/doi/10.1073/pnas.1309606110>
- 20  
21  
22 10 12. Yang Q-S, Gao J, He W-D, Dou T-X, Ding L-J, Wu J-H, et al. Comparative transcriptomics  
23  
24 11 analysis reveals difference of key gene expression between banana and plantain in response to cold  
25  
26  
27 12 stress. BMC Genomics [Internet]. BioMed Central; 2015 [cited 2016 Aug 8];16:446. Available  
28  
29 13 from: <http://www.biomedcentral.com/1471-2164/16/446>
- 30  
31 14 13. Davidson RM, Gowda M, Moghe G, Lin H, Vaillancourt B, Shiu S-H, et al. Comparative  
32  
33  
34 15 transcriptomics of three Poaceae species reveals patterns of gene expression evolution. Plant J.  
35  
36 16 [Internet]. 2012 [cited 2016 Aug 8];71:492–502. Available from:  
37  
38  
39 17 <http://www.ncbi.nlm.nih.gov/pubmed/22443345>
- 40  
41 18 14. Jiao Y, Leebens-Mack J, Ayyampalayam S, Bowers JE, McKain MR, McNeal J, et al. A  
42  
43  
44 19 genome triplication associated with early diversification of the core eudicots. Genome Biol.  
45  
46 20 [Internet]. BioMed Central; 2012 [cited 2017 Feb 16];13:R3. Available from:  
47  
48  
49 21 <http://genomebiology.biomedcentral.com/articles/10.1186/gb-2012-13-1-r3>
- 50  
51 22 15. Ferrarini M, Moretto M, Ward JA, Šurbanovski N, Stevanović V, Giongo L, et al. An  
52  
53  
54 23 evaluation of the PacBio RS platform for sequencing and de novo assembly of a chloroplast  
55  
56 24 genome. BMC Genomics [Internet]. BioMed Central; 2013 [cited 2016 Aug 8];14:670. Available  
57  
58 25 from: <http://bmcgenomics.biomedcentral.com/articles/10.1186/1471-2164-14-670>
- 59  
60  
61 26 16. Dolezel J, Bartos J, Voglmayr H, Greilhuber J. Letter to the editor. Cytometry [Internet]. Wiley

- 1 Subscription Services, Inc., A Wiley Company; 2003 [cited 2016 Aug 9];51A:127–8. Available  
2 from: <http://doi.wiley.com/10.1002/cyto.a.10013>  
3
- 4 17. English AC, Richards S, Han Y, Wang M, Vee V, Qu J, et al. Mind the Gap: Upgrading  
5 Genomes with Pacific Biosciences RS Long-Read Sequencing Technology. Liu Z, editor. PLoS  
6 One [Internet]. Public Library of Science; 2012 [cited 2016 Aug 8];7:e47768. Available from:  
7 <http://dx.plos.org/10.1371/journal.pone.0047768>  
8
- 9 18. Day RC, Herridge RP, Ambrose BA, Macknight RC. Transcriptome Analysis of Proliferating  
10 Arabidopsis Endosperm Reveals Biological Implications for the Control of Syncytial Division,  
11 Cytokinin Signaling, and Gene Expression Regulation. PLANT Physiol. [Internet]. American  
12 Society of Plant Biologists; 2008 [cited 2016 Aug 10];148:1964–84. Available from:  
13 <http://www.plantphysiol.org/cgi/doi/10.1104/pp.108.128108>  
14
- 15 19. Hehenberger E, Kradolfer D, Köhler C. Endosperm cellularization defines an important  
16 developmental transition for embryo development. Development [Internet]. 2012 [cited 2016 Aug  
17 10];139:2031–9. Available from: <http://www.ncbi.nlm.nih.gov/pubmed/22535409>  
18
- 19 20. Fang S-C, Fernandez DE. Effect of regulated overexpression of the MADS domain factor  
20 AGL15 on flower senescence and fruit maturation. Plant Physiol. [Internet]. 2002 [cited 2016 Aug  
21 10];130:78–89. Available from: <http://www.ncbi.nlm.nih.gov/pubmed/12226488>  
22
- 23 21. VanBuren R, Bryant D, Bushakra JM, Vining KJ, Edger PP, Rowley ER, et al. The genome of  
24 black raspberry (*Rubus occidentalis*). Plant J. [Internet]. 2016 [cited 2016 Aug 16]; Available from:  
25 <http://www.ncbi.nlm.nih.gov/pubmed/27228578>  
26
- 27 22. Mabberley DJ. *Potentilla* and *Fragaria* (Rosaceae) reunited. *Telopea*. 2002;9:793–801.  
28
- 29 23. Dickson EE, Arumuganathan K, Kresovich S, Doyle JJ, Kresovich S, Doyle2 JJ. Nuclear DNA  
30 Content Variation within the Rosaceae NUCLEAR DNA CONTENT VARIATION WITHIN THE  
31 ROSACEAE'. *Am. J. Bot.* *Am. J. Bot.* *Am. J. Bot.* [Internet]. 1992 [cited 2016 Nov 5];79:1081–6.  
32 Available from: [http://scholarcommons.sc.edu/biol\\_facpub](http://scholarcommons.sc.edu/biol_facpub)  
33
- 34 24. Meng R, Finn C. Determining Ploidy Level and Nuclear DNA Content in *Rubus* by Flow  
35

- 1 Cytometry. J. Am. Soc. Hortic. Sci. American Society for Horticultural Science; 2002;127:767–75.  
1
- 2 25. Rajapakse S, Byrne DH, Zhang L, Anderson N, Arumuganathan K, Ballard RE. Two genetic  
3  
4 linkage maps of tetraploid roses. TAG Theor. Appl. Genet. [Internet]. Springer-Verlag; 2001 [cited  
5 3  
6  
7 4  
8  
9 2016 Nov 5];103:575–83. Available from: <http://link.springer.com/10.1007/PL00002912>
- 10 26. Yokoya K, Roberts A V., Mottley J, Lewis R, Brandham PE. Nuclear DNA Amounts in Roses.  
11  
12 6  
13 Ann. Bot. [Internet]. Oxford University Press; 2000 [cited 2016 Nov 5];85:557–61. Available from:  
14 7  
15 <http://aob.oxfordjournals.org/cgi/doi/10.1006/anbo.1999.1102>
- 16  
17 8  
18 27. Vitte C, Fustier M-A, Alix K, Tenailon MI. The bright side of transposons in crop evolution.  
19 9  
20 Brief. Funct. Genomics [Internet]. Oxford University Press; 2014 [cited 2016 Aug 15];13:276–95.  
21  
22 10  
23 Available from: <http://www.ncbi.nlm.nih.gov/pubmed/24681749>
- 24 11  
25 28. Hawkins JS, Kim H, Nason JD, Wing RA, Wendel JF. Differential lineage-specific  
26  
27 12  
28 amplification of transposable elements is responsible for genome size variation in *Gossypium*.  
29 13  
30 Genome Res. [Internet]. Cold Spring Harbor Laboratory Press; 2006 [cited 2016 Aug 15];16:1252–  
31 14  
32 61. Available from: <http://www.ncbi.nlm.nih.gov/pubmed/16954538>
- 33  
34 15  
35 29. Piegu B, Guyot R, Picault N, Roulin A, Sanyal A, Saniyal A, et al. Doubling genome size  
36 16  
37 without polyploidization: dynamics of retrotransposition-driven genomic expansions in *Oryza*  
38  
39 17  
40 *australiensis*, a wild relative of rice. Genome Res. [Internet]. Cold Spring Harbor Laboratory Press;  
41 18  
42 2006 [cited 2016 Aug 15];16:1262–9. Available from:  
43  
44 19  
45 <http://www.ncbi.nlm.nih.gov/pubmed/16963705>
- 46 20  
47 30. Mahoney LL, Sargent DJ, Abebe-Akele F, Wood DJ, Ward JA, Bassil N V., et al. A High-  
48  
49 21  
50 Density Linkage Map of the Ancestral Diploid Strawberry Constructed with Single Nucleotide  
51 22  
52 Polymorphism Markers from the IStraw90 Array and Genotyping by Sequencing. Plant Genome  
53  
54 23  
55 [Internet]. 2016 [cited 2016 Aug 15];9:0. Available from:  
56 24  
57 <https://dl.sciencesocieties.org/publications/tpg/abstracts/9/2/plantgenome2015.08.0071>
- 58 25  
59 31. Šurbanovski N, Brillì M, Moser M, Si-Ammour A. A highly specific microRNA-mediated  
60  
61 26  
62 mechanism silences LTR retrotransposons of strawberry. Plant J. [Internet]. 2016 [cited 2017 Apr  
63  
64  
65

- 1 22];85:70–82. Available from: <http://www.ncbi.nlm.nih.gov/pubmed/26611654>  
1
- 2 32. Kazazian HH. Genetics. L1 retrotransposons shape the mammalian genome. Science [Internet].  
3  
4 2000 [cited 2016 Aug 16];289:1152–3. Available from:  
5  
6  
7 4 <http://www.ncbi.nlm.nih.gov/pubmed/10970230>  
8  
9
- 10 33. von Sternberg R, Shapiro JA. How repeated retroelements format genome function. Cytogenet.  
11  
12 6 Genome Res. [Internet]. 2005 [cited 2016 Aug 16];110:108–16. Available from:  
13  
14 7 <http://www.ncbi.nlm.nih.gov/pubmed/16093662>  
15  
16
- 17 8 34. Slotkin RK, Martienssen R. Transposable elements and the epigenetic regulation of the genome.  
18  
19 9 Nat. Rev. Genet. [Internet]. Nature Publishing Group; 2007 [cited 2016 Aug 16];8:272–85.  
20  
21  
22 10 Available from: <http://www.nature.com/doi/10.1038/nrg2072>  
23
- 24 11 35. Smaczniak C, Immink RGH, Angenent GC, Kaufmann K, Adamczyk BJ, Fernandez DE, et al.  
25  
26 12 Developmental and evolutionary diversity of plant MADS-domain factors: insights from recent  
27  
28  
29 13 studies. Development [Internet]. Oxford University Press for The Company of Biologists Limited;  
30  
31 14 2012 [cited 2016 Aug 15];139:3081–98. Available from:  
32  
33  
34 15 <http://www.ncbi.nlm.nih.gov/pubmed/22872082>  
35
- 36 16 36. Shirzadi R, Andersen ED, Bjerkan KN, Gloeckle BM, Heese M, Ungru A, et al. Genome-wide  
37  
38  
39 17 transcript profiling of endosperm without paternal contribution identifies parent-of-origin-  
40  
41 18 dependent regulation of AGAMOUS-LIKE36. PLoS Genet. [Internet]. 2011 [cited 2016 Aug  
42  
43  
44 19 16];7:e1001303. Available from: <http://www.ncbi.nlm.nih.gov/pubmed/21379330>  
45
- 46 20 37. Harding EW, Tang W, Nichols KW, Fernandez DE, Perry SE. Expression and maintenance of  
47  
48  
49 21 embryogenic potential is enhanced through constitutive expression of AGAMOUS-Like 15. Plant  
50  
51 22 Physiol. [Internet]. 2003 [cited 2016 Aug 16];133:653–63. Available from:  
52  
53 23 <http://www.ncbi.nlm.nih.gov/pubmed/14512519>  
54  
55
- 56 24 38. Serivichyaswat P, Ryu H-S, Kim W, Kim S, Chung KS, Kim JJ, et al. Expression of the floral  
57  
58 25 repressor miRNA156 is positively regulated by the AGAMOUS-like proteins AGL15 and AGL18.  
59  
60  
61 26 Mol. Cells [Internet]. Korean Society for Molecular and Cellular Biology; 2015 [cited 2016 Aug  
62  
63  
64  
65



- 1 16];38:259–66. Available from: <http://www.ncbi.nlm.nih.gov/pubmed/25666346>
- 2 39. Chen D-H, Ronald PC. A Rapid DNA Minipreparation Method Suitable for AFLP and Other  
3  
4 PCR Applications. *Plant Mol. Biol. Report.* [Internet]. Kluwer Academic Publishers; 1999 [cited  
5 3  
6  
7 4 2016 Aug 8];17:53–7. Available from: <http://link.springer.com/10.1023/A:1007585532036>
- 8  
9  
10 5 40. Butler J, MacCallum I, Kleber M, Shlyakhter IA, Belmonte MK, Lander ES, et al. ALLPATHS:  
11  
12 6 de novo assembly of whole-genome shotgun microreads. *Genome Res.* [Internet]. 2008 [cited 2016  
13  
14 7 Aug 8];18:810–20. Available from: <http://www.ncbi.nlm.nih.gov/pubmed/18340039>
- 15  
16  
17 8 41. Smit AFA, Hubley R. RepeatModeler - 1.0.7 [Internet]. 2013. Available from:  
18  
19 9 <http://www.repeatmasker.org/RepeatModeler.html>
- 20  
21  
22 10 42. Smit A, Hubley R, Green P. RepeatMasker Open-4.0 [Internet]. 2013. Available from:  
23  
24 11 <http://www.repeatmasker.org/>
- 25  
26  
27 12 43. Lomsadze A, Burns PD, Borodovsky M. Integration of mapped RNA-Seq reads into automatic  
28  
29 13 training of eukaryotic gene finding algorithm. *Nucleic Acids Res.* [Internet]. Oxford University  
30  
31 14 Press; 2014 [cited 2016 Aug 8];42:e119. Available from:  
32  
33  
34 15 <http://www.ncbi.nlm.nih.gov/pubmed/24990371>
- 35  
36  
37 16 44. Dobin A, Davis CA, Schlesinger F, Drenkow J, Zaleski C, Jha S, et al. STAR: ultrafast  
38  
39 17 universal RNA-seq aligner. *Bioinformatics* [Internet]. Oxford University Press; 2013 [cited 2016  
40  
41 18 Aug 8];29:15–21. Available from: <http://www.ncbi.nlm.nih.gov/pubmed/23104886>
- 42  
43  
44 19 45. Conesa A, Götz S. Blast2GO: A comprehensive suite for functional analysis in plant genomics.  
45  
46 20 *Int. J. Plant Genomics* [Internet]. Hindawi Publishing Corporation; 2008 [cited 2016 Aug  
47  
48 21 8];2008:619832. Available from: <http://www.ncbi.nlm.nih.gov/pubmed/18483572>
- 49  
50  
51 22 46. Ostlund G, Schmitt T, Forslund K, Köstler T, Messina DN, Roopra S, et al. InParanoid 7: new  
52  
53 23 algorithms and tools for eukaryotic orthology analysis. *Nucleic Acids Res.* [Internet]. 2010 [cited  
54  
55 24 2016 Aug 10];38:D196-203. Available from: <http://www.ncbi.nlm.nih.gov/pubmed/19892828>
- 56  
57  
58 25 47. Jung S, Staton M, Lee T, Blenda A, Svancara R, Abbott A, et al. GDR (Genome Database for  
59  
60 26 Rosaceae): integrated web-database for Rosaceae genomics and genetics data. *Nucleic Acids Res.*

- 1 [Internet]. Oxford University Press; 2008 [cited 2016 Aug 9];36:D1034-40. Available from:  
1  
2 2 <http://www.ncbi.nlm.nih.gov/pubmed/17932055>  
3  
4  
5 3 48. Andrews S. Babraham Bioinformatics - FastQC A Quality Control tool for High Throughput  
6  
7 4 Sequence Data [Internet]. 2010. Available from:  
8  
9  
10 5 <http://www.bioinformatics.babraham.ac.uk/projects/fastqc/>  
11  
12 6 49. Bolger AM, Lohse M, Usadel B. Trimmomatic: a flexible trimmer for Illumina sequence data.  
13  
14 7 Bioinformatics [Internet]. Oxford University Press; 2014 [cited 2016 Aug 9];30:2114–20. Available  
15  
16 from: <http://www.ncbi.nlm.nih.gov/pubmed/24695404>  
17 8  
18  
19 9 50. Langmead B, Salzberg SL. Fast gapped-read alignment with Bowtie 2. Nat. Methods [Internet].  
20  
21 NIH Public Access; 2012 [cited 2016 Aug 8];9:357–9. Available from:  
22 10  
23  
24 11 <http://www.ncbi.nlm.nih.gov/pubmed/22388286>  
25  
26  
27 12 51. Mortazavi A, Williams BA, McCue K, Schaeffer L, Wold B. Mapping and quantifying  
28  
29 13 mammalian transcriptomes by RNA-Seq. Nat. Methods [Internet]. Nature Publishing Group; 2008  
30  
31 14 [cited 2016 Aug 8];5:621–8. Available from: <http://www.nature.com/doi/10.1038/nmeth.1226>  
32  
33  
34 15 52. Marchler-Bauer A, Derbyshire MK, Gonzales NR, Lu S, Chitsaz F, Geer LY, et al. CDD:  
35  
36 16 NCBI’s conserved domain database. Nucleic Acids Res. [Internet]. 2015 [cited 2016 Aug  
37  
38 8];43:D222-6. Available from: <http://www.ncbi.nlm.nih.gov/pubmed/25414356>  
39 17  
40  
41 18 53. Quinlan AR, Hall IM. BEDTools: a flexible suite of utilities for comparing genomic features.  
42  
43 19 Bioinformatics [Internet]. 2010 [cited 2016 Aug 8];26:841–2. Available from:  
44  
45  
46 20 <http://www.ncbi.nlm.nih.gov/pubmed/20110278>  
47  
48  
49 21 54. Liu K, Warnow TJ, Holder MT, Nelesen SM, Yu J, Stamatakis AP, et al. SATE-II: very fast and  
50  
51 22 accurate simultaneous estimation of multiple sequence alignments and phylogenetic trees. Syst.  
52  
53 23 Biol. [Internet]. Oxford University Press; 2012 [cited 2016 Aug 9];61:90–106. Available from:  
54  
55  
56 24 <http://www.ncbi.nlm.nih.gov/pubmed/22139466>  
57  
58 25 55. Kumar S, Stecher G, Tamura K. MEGA7: Molecular Evolutionary Genetics Analysis Version  
59  
60 7.0 for Bigger Datasets. Mol. Biol. Evol. [Internet]. 2016;33:1870–4. Available from:  
61 26  
62  
63  
64  
65

- 1 <https://academic.oup.com/mbe/article-lookup/doi/10.1093/molbev/msw054>
- 2 56. Letunic I, Bork P. Interactive Tree Of Life v2: online annotation and display of phylogenetic  
3 trees made easy. *Nucleic Acids Res.* [Internet]. Oxford University Press; 2011 [cited 2016 Aug  
4 8];39:W475-8. Available from: <http://www.ncbi.nlm.nih.gov/pubmed/21470960>
- 5 57. Huala E, Dickerman AW, Garcia-Hernandez M, Weems D, Reiser L, LaFond F, et al. The  
6 Arabidopsis Information Resource (TAIR): a comprehensive database and web-based information  
7 retrieval, analysis, and visualization system for a model plant. *Nucleic Acids Res.* [Internet]. Oxford  
8 University Press; 2001 [cited 2016 Aug 8];29:102–5. Available from:  
9 <http://www.ncbi.nlm.nih.gov/pubmed/11125061>
- 10 58. Novák P, Neumann P, Pech J, Steinhaisl J, Macas J. RepeatExplorer: a Galaxy-based web  
11 server for genome-wide characterization of eukaryotic repetitive elements from next-generation  
12 sequence reads. *Bioinformatics* [Internet]. 2013 [cited 2016 Aug 9];29:792–3. Available from:  
13 <http://www.ncbi.nlm.nih.gov/pubmed/23376349>
- 14 59. Jurka J, Kapitonov VV, Pavlicek A, Klonowski P, Kohany O, Walichiewicz J. Repbase Update,  
15 a database of eukaryotic repetitive elements. *Cytogenet. Genome Res.* [Internet]. Karger Publishers;  
16 2005 [cited 2016 Aug 9];110:462–7. Available from:  
17 <http://www.karger.com/?doi=10.1159/000084979>
- 18 60. Xu Z, Wang H. LTR\_FINDER: an efficient tool for the prediction of full-length LTR  
19 retrotransposons. *Nucleic Acids Res.* [Internet]. Oxford University Press; 2007 [cited 2016 Aug  
20 8];35:W265-8. Available from: <http://www.ncbi.nlm.nih.gov/pubmed/17485477>
- 21 61. Sonnhammer EL, Durbin R. A dot-matrix program with dynamic threshold control suited for  
22 genomic DNA and protein sequence analysis. *Gene* [Internet]. 1995 [cited 2016 Aug 8];167:GC1-  
23 10. Available from: <http://www.ncbi.nlm.nih.gov/pubmed/8566757>
- 24 62. Li H, Durbin R. Fast and accurate short read alignment with Burrows-Wheeler transform.  
25 *Bioinformatics* [Internet]. 2009 [cited 2016 Aug 9];25:1754–60. Available from:  
26 <http://www.ncbi.nlm.nih.gov/pubmed/19451168>

- 1 63. Li H, Handsaker B, Wysoker A, Fennell T, Ruan J, Homer N, et al. The Sequence  
2 Alignment/Map format and SAMtools. Bioinformatics [Internet]. 2009 [cited 2016 Aug  
3 9];25:2078–9. Available from: <http://www.ncbi.nlm.nih.gov/pubmed/19505943>  
4  
5 64. Thompson JD, Higgins DG, Gibson TJ. CLUSTAL W: improving the sensitivity of progressive  
6 multiple sequence alignment through sequence weighting, position-specific gap penalties and  
7 weight matrix choice. Nucleic Acids Res. [Internet]. 1994 [cited 2016 Aug 9];22:4673–80.  
8 Available from: <http://www.ncbi.nlm.nih.gov/pubmed/7984417>  
9  
10 65. Rozas J, Rozas R. DnaSP version 3: an integrated program for molecular population genetics  
11 and molecular evolution analysis. Bioinformatics [Internet]. 1999 [cited 2016 Aug 9];15:174–5.  
12 Available from: <http://www.ncbi.nlm.nih.gov/pubmed/10089204>  
13  
14 66. Kimura M. A simple method for estimating evolutionary rates of base substitutions through  
15 comparative studies of nucleotide sequences. J. Mol. Evol. [Internet]. 1980 [cited 2016 Aug  
16 9];16:111–20. Available from: <http://www.ncbi.nlm.nih.gov/pubmed/7463489>  
17  
18 67. Sanmiguel P, Bennetzen JL. Evidence that a Recent Increase in Maize Genome Size was  
19 Caused by the Massive Amplification of Intergene Retrotransposons. Ann. Bot. Oxford University  
20 Press; 1998;82:37–44.  
21  
22 68. Ma J, Bennetzen JL. Rapid recent growth and divergence of rice nuclear genomes. Proc. Natl.  
23 Acad. Sci. U. S. A. [Internet]. National Academy of Sciences; 2004 [cited 2016 Aug 9];101:12404–  
24 10. Available from: <http://www.ncbi.nlm.nih.gov/pubmed/15240870>  
25  
26  
27  
28  
29  
30  
31  
32  
33  
34  
35  
36  
37  
38  
39  
40  
41  
42  
43  
44  
45  
46  
47  
48  
49

## 50 **FIGURE LEGENDS AND TABLES**

51 **Figure 1.** Comparison of *Fragaria vesca* and *Potentilla micrantha* morphology for leaves, flowers  
52 and fruits.  
53  
54

55 **Figure 2.** Anchoring of *Potentilla micrantha* genome scaffolds to the *Fragaria vesca* Fvb  
56 pseudomolecules.  
57  
58  
59

60 **Figure 3.** *Potentilla micrantha* flower/fruit developmental stages used for RNA extraction.  
61  
62  
63  
64  
65

1 **Figure 4.** Differentially expressed genes during fruit development in *P. micrantha* and *F. vesca*.  
 2 Volcano plots of differential expression analysis between the four developmental stages A-B-C-D in  
 3 *Potentilla micrantha* and *Fragaria vesca*. Using a cut-off of  $\sqrt{\text{MSR}} > 2.00$  and  $p\text{-value} < 10^{-3}$ ,  
 4  
 5 1,556 genes were differentially expressed in *Potentilla micrantha*, whilst 816 genes were  
 6  
 7 differentially expressed in *Fragaria vesca*.

8  
 9  
 10 **Figure 5.** Phylogenetic reconstruction of the *Potentilla micrantha* and *Fragaria vesca* genes  
 11  
 12 containing MADs-box, along with the relative gene expression levels for each gene.

13  
 14  
 15 **Figure 6.** The three identified clades of orthologous genes that were not expressed or poorly  
 16  
 17 expressed in *Potentilla micrantha* but highly expressed in *Fragaria vesca*. These genes may play a  
 18  
 19 role in fleshy fruit formation in *Fragaria vesca*.

20  
 21  
 22 **Figure 7.** The overall composition of the *Potentilla micrantha* genome according to the analyses  
 23  
 24 performed using RepeatExplorer.

25  
 26  
 27 **Figure 8.** Distributions of *Copia*, *Gypsy*, and unknown full-length LTR-REs according to their  
 28  
 29 estimated insertion ages (MYA). For each superfamily the mean insertion age is reported.

30  
 31  
 32  
 33  
 34  
 35  
 36  
 37  
 38  
 39 **Table 1.** *Potentilla micrantha* assembly stats

|                                | ALLPATHS-LG Illumina data | PacBio PBJelly      |
|--------------------------------|---------------------------|---------------------|
| Number of scaffolds            | 2,866                     | 2,674 (-6.7%)       |
| Total size of scaffolds        | 315,266,043               | 326,533,584 (+3.5%) |
| Longest scaffold               | 3,162,838                 | 3,488,351 (+9.3%)   |
| N50 scaffold length            | 318,490                   | 335,712 (+5.1%)     |
| Gapped Ns in scaffolds         | 67,706,454                | 27,311,787 (-59.7%) |
| Number of contigs              | 33,026                    | n/a                 |
| Number of contigs in scaffolds | 32,063                    | n/a                 |

|                       |             |     |
|-----------------------|-------------|-----|
| Total size of contigs | 247,565,733 | n/a |
| N50 contig length     | 16,235      | n/a |

**Table 2.** Annotation of 505 full-length LTR-retrotransposons of *Potentilla micrantha*.

| Superfamily  | Family               | Number     | Percentage   |
|--------------|----------------------|------------|--------------|
| Ty1-Copia    | <i>AleI/Retrofit</i> | 14         | 2.77         |
|              | <i>AleII</i>         | 26         | 5.15         |
|              | <i>Angela</i>        | 20         | 3.96         |
|              | <i>Bianca</i>        | 114        | 22.57        |
|              | <i>Ivana</i>         | 23         | 4.55         |
|              | <i>Maximus/SIRE</i>  | 10         | 1.98         |
|              | <i>TAR/Tork</i>      | 11         | 2.18         |
|              | Unknown              | 2          | 0.40         |
|              | <b>Total</b>         | <b>220</b> | <b>43.56</b> |
| Ty3-Gypsy    | <i>Athila</i>        | 3          | 0.59         |
|              | <i>Chromovirus</i>   | 42         | 8.32         |
|              | <i>Ogre/TAT</i>      | 186        | 36.83        |
|              | Unknown              | 25         | 4.95         |
|              | <b>Total</b>         | <b>256</b> | <b>50.69</b> |
| Unclassified |                      | 29         | 5.74         |

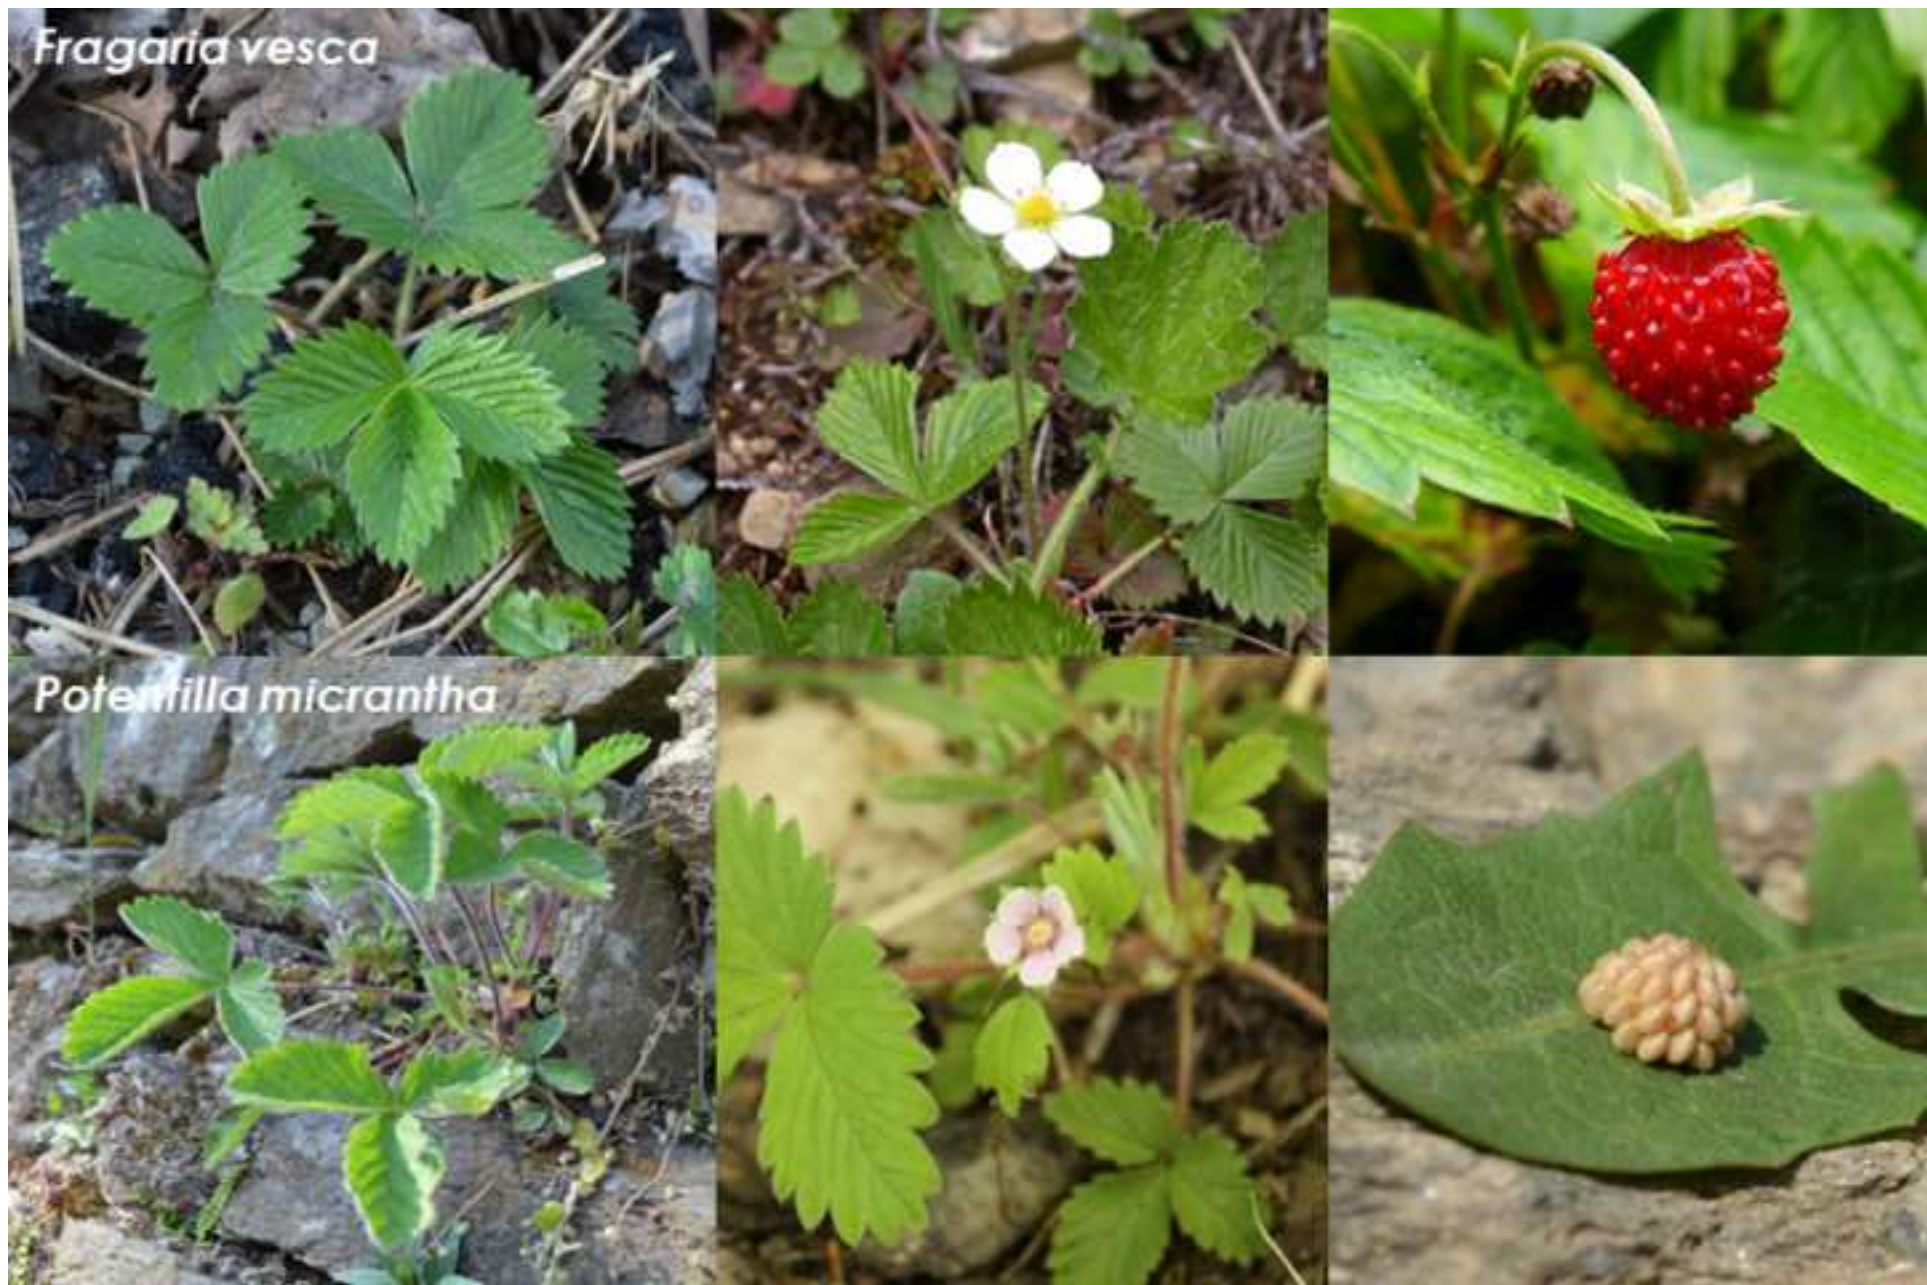



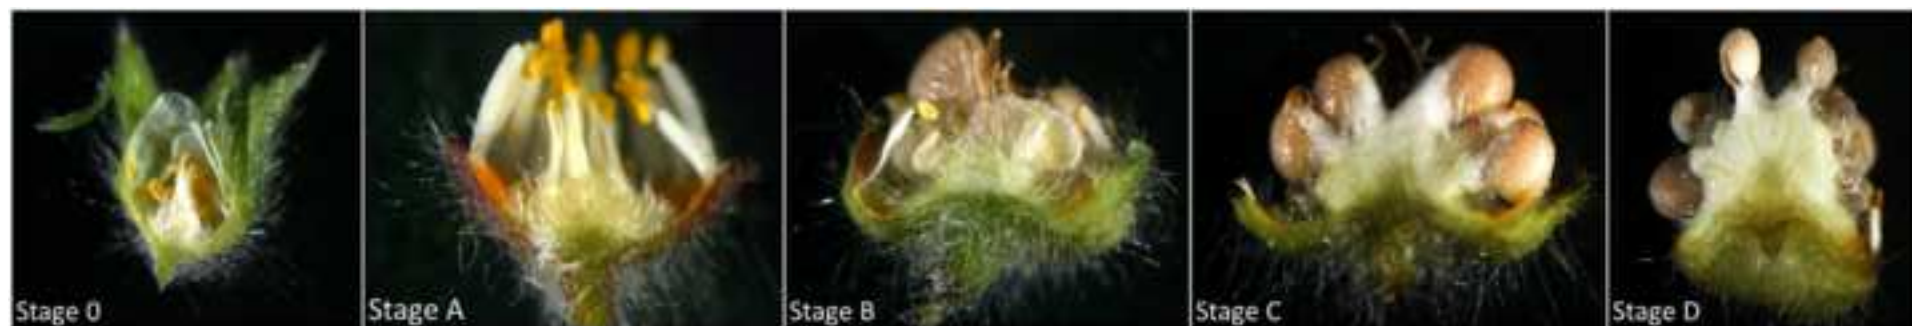



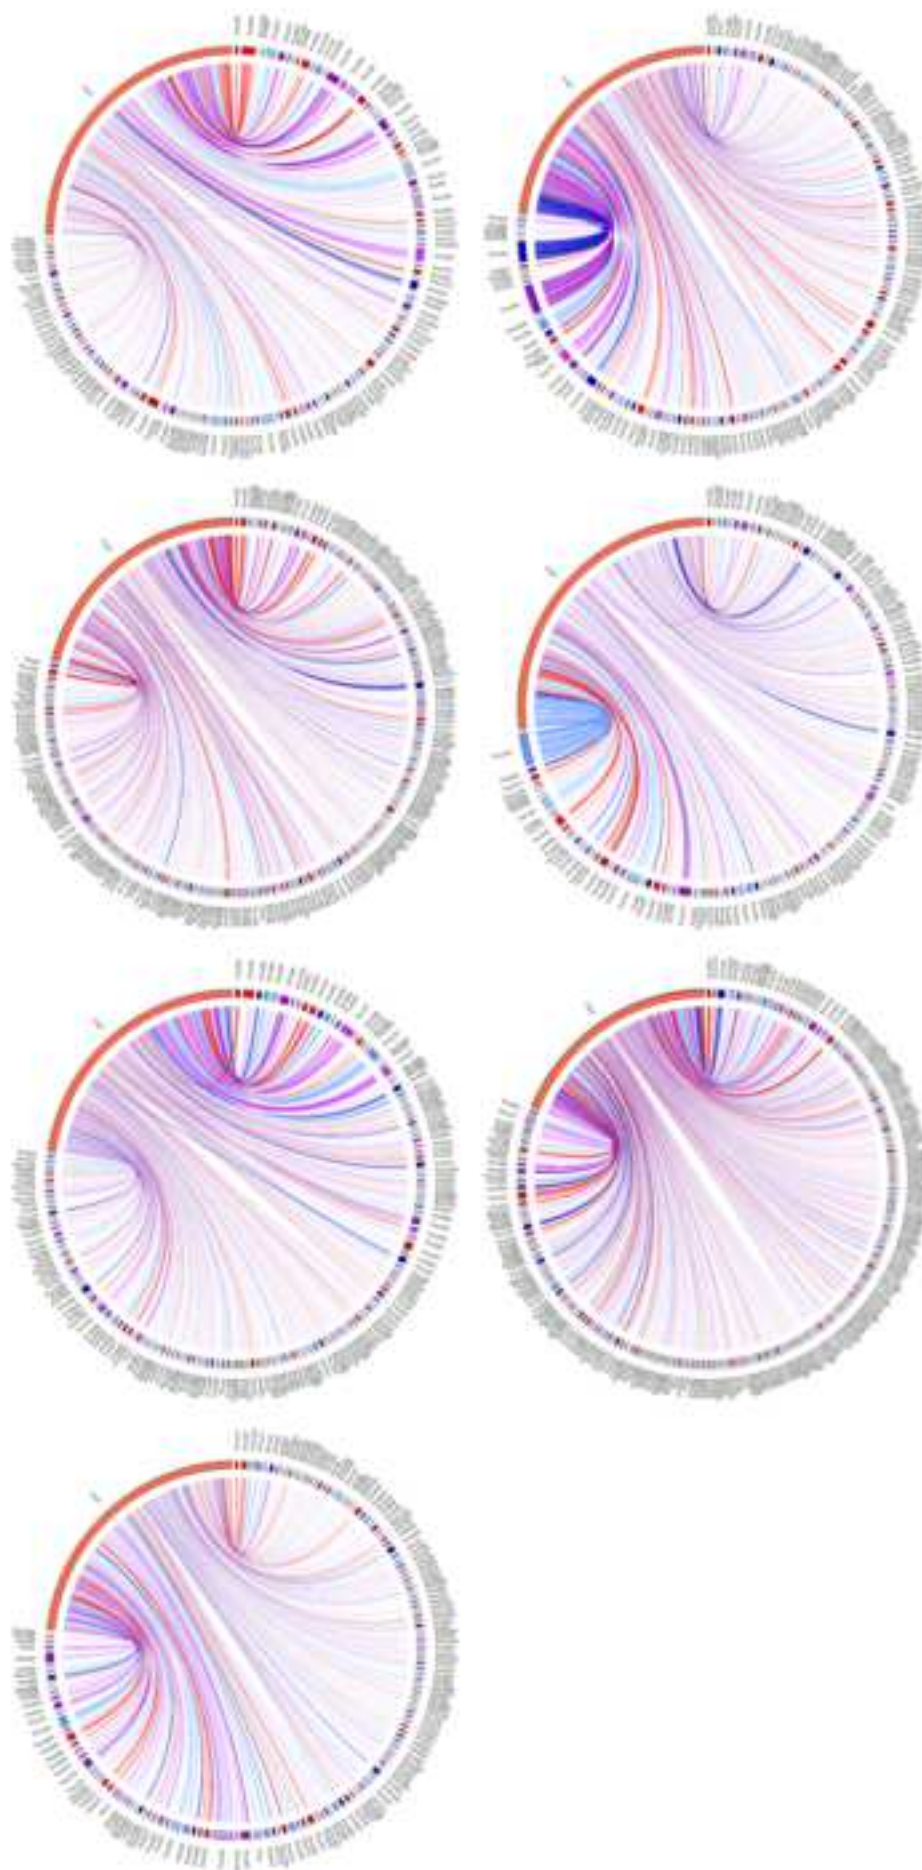

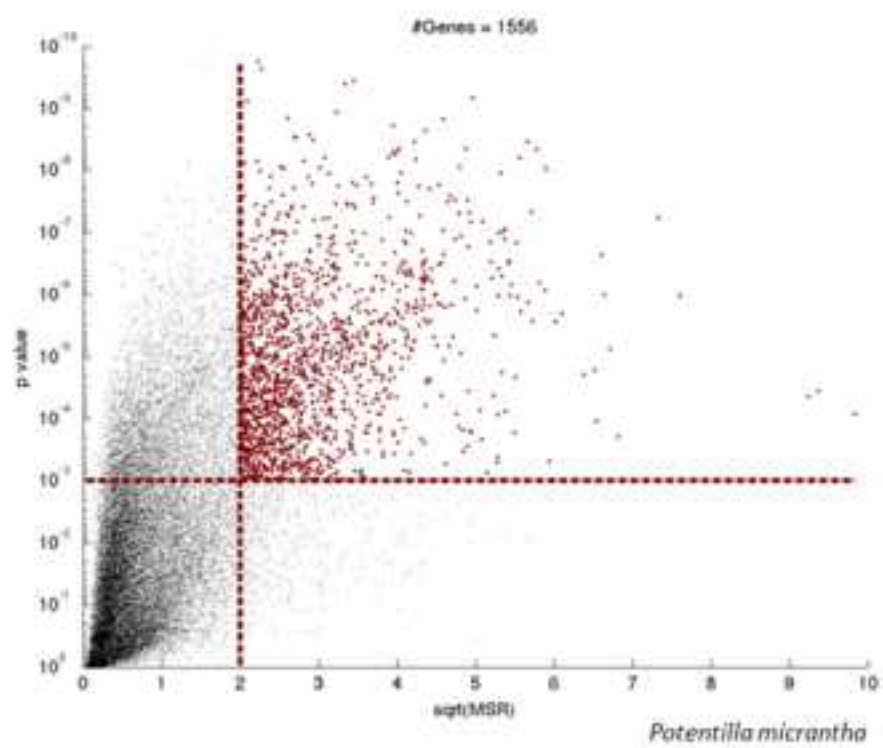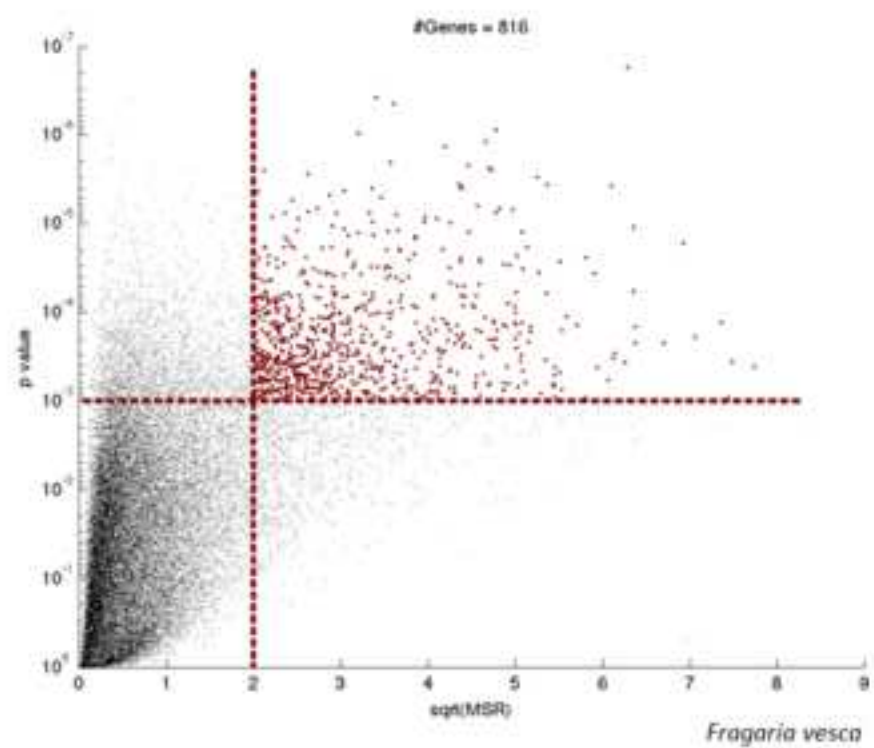

Figure 5

[Click here to download Figure Figure 5.tif](#)

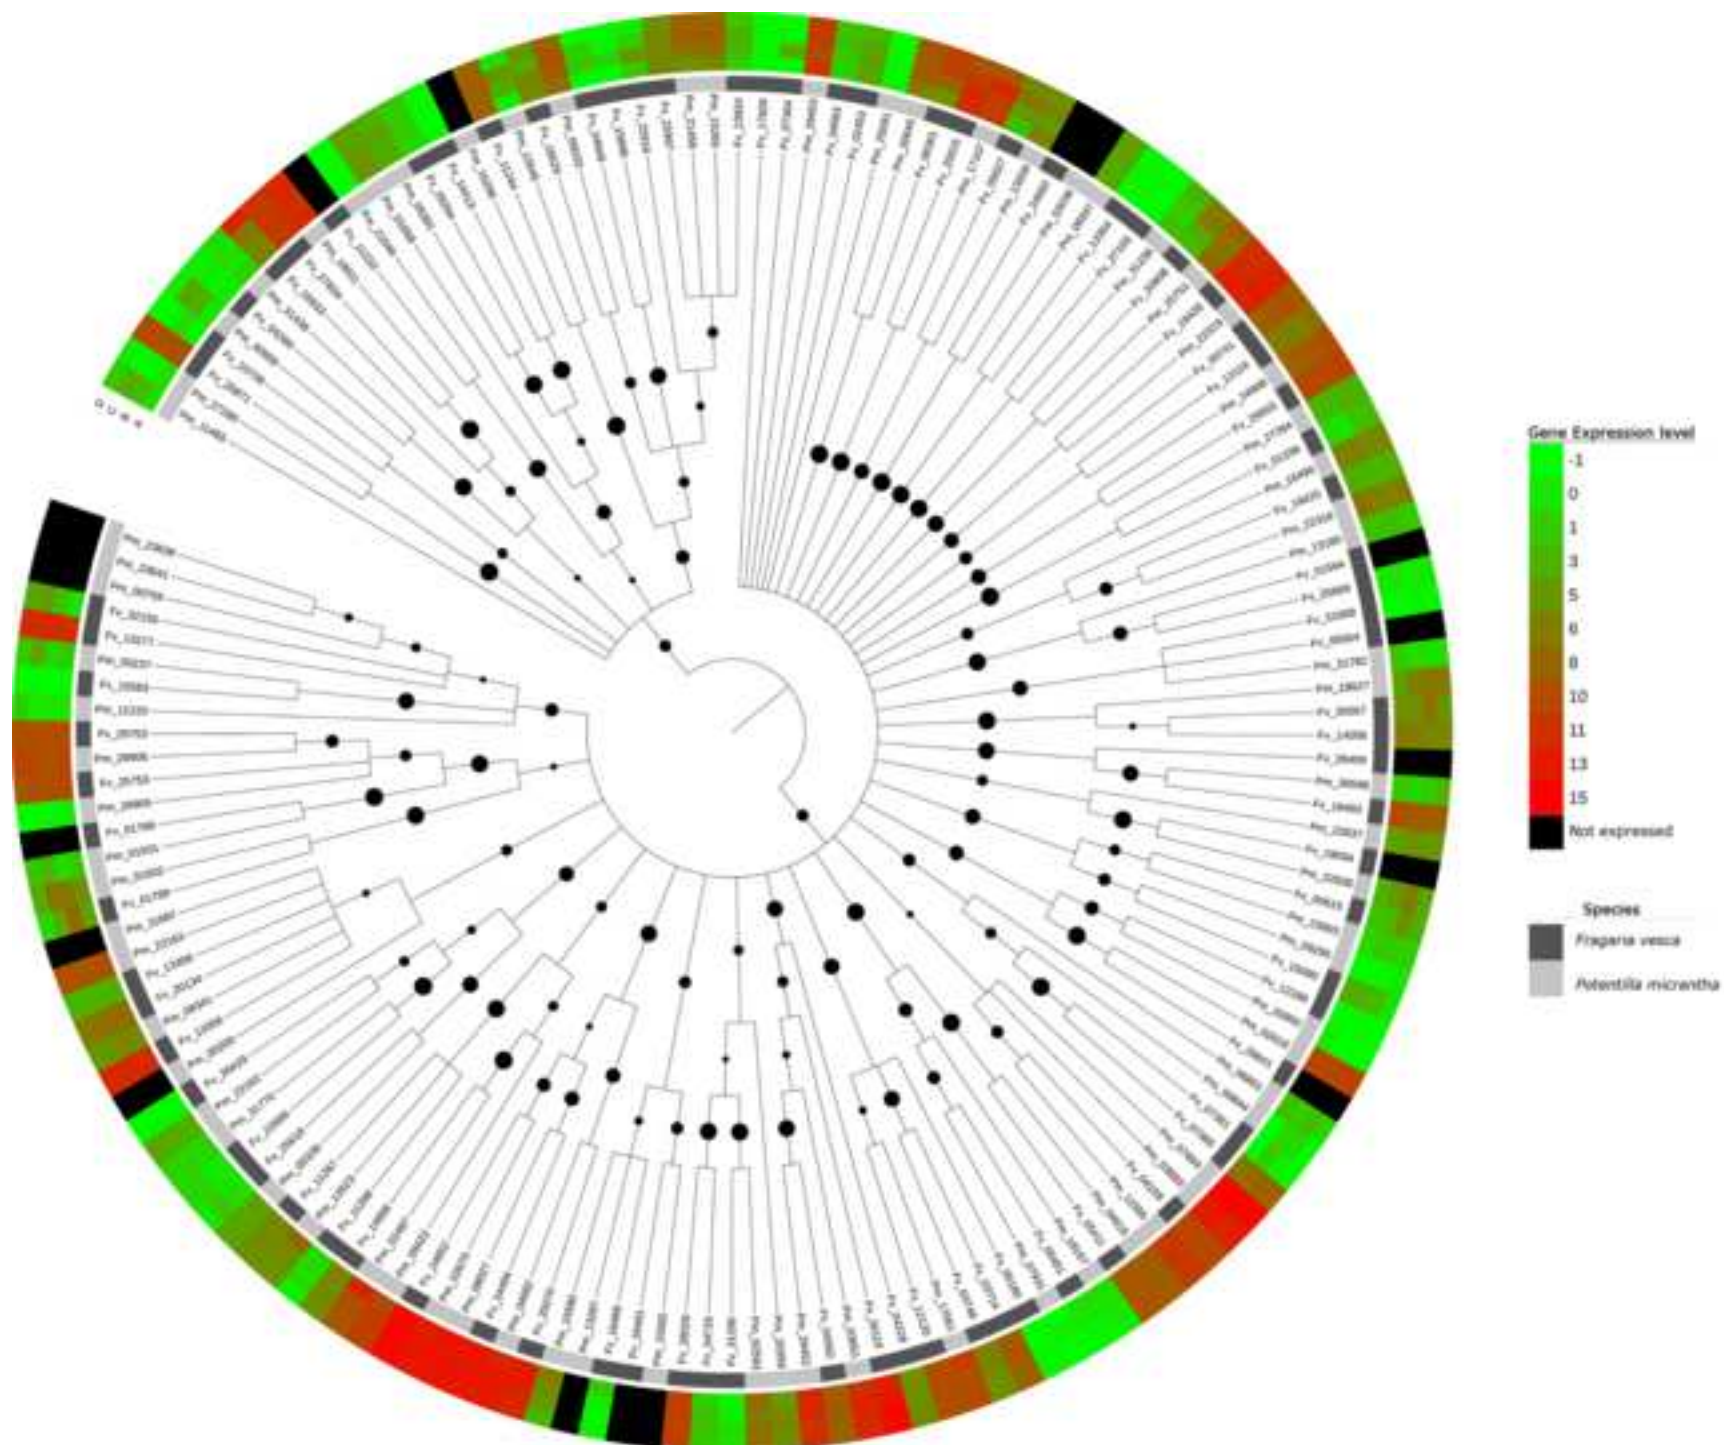

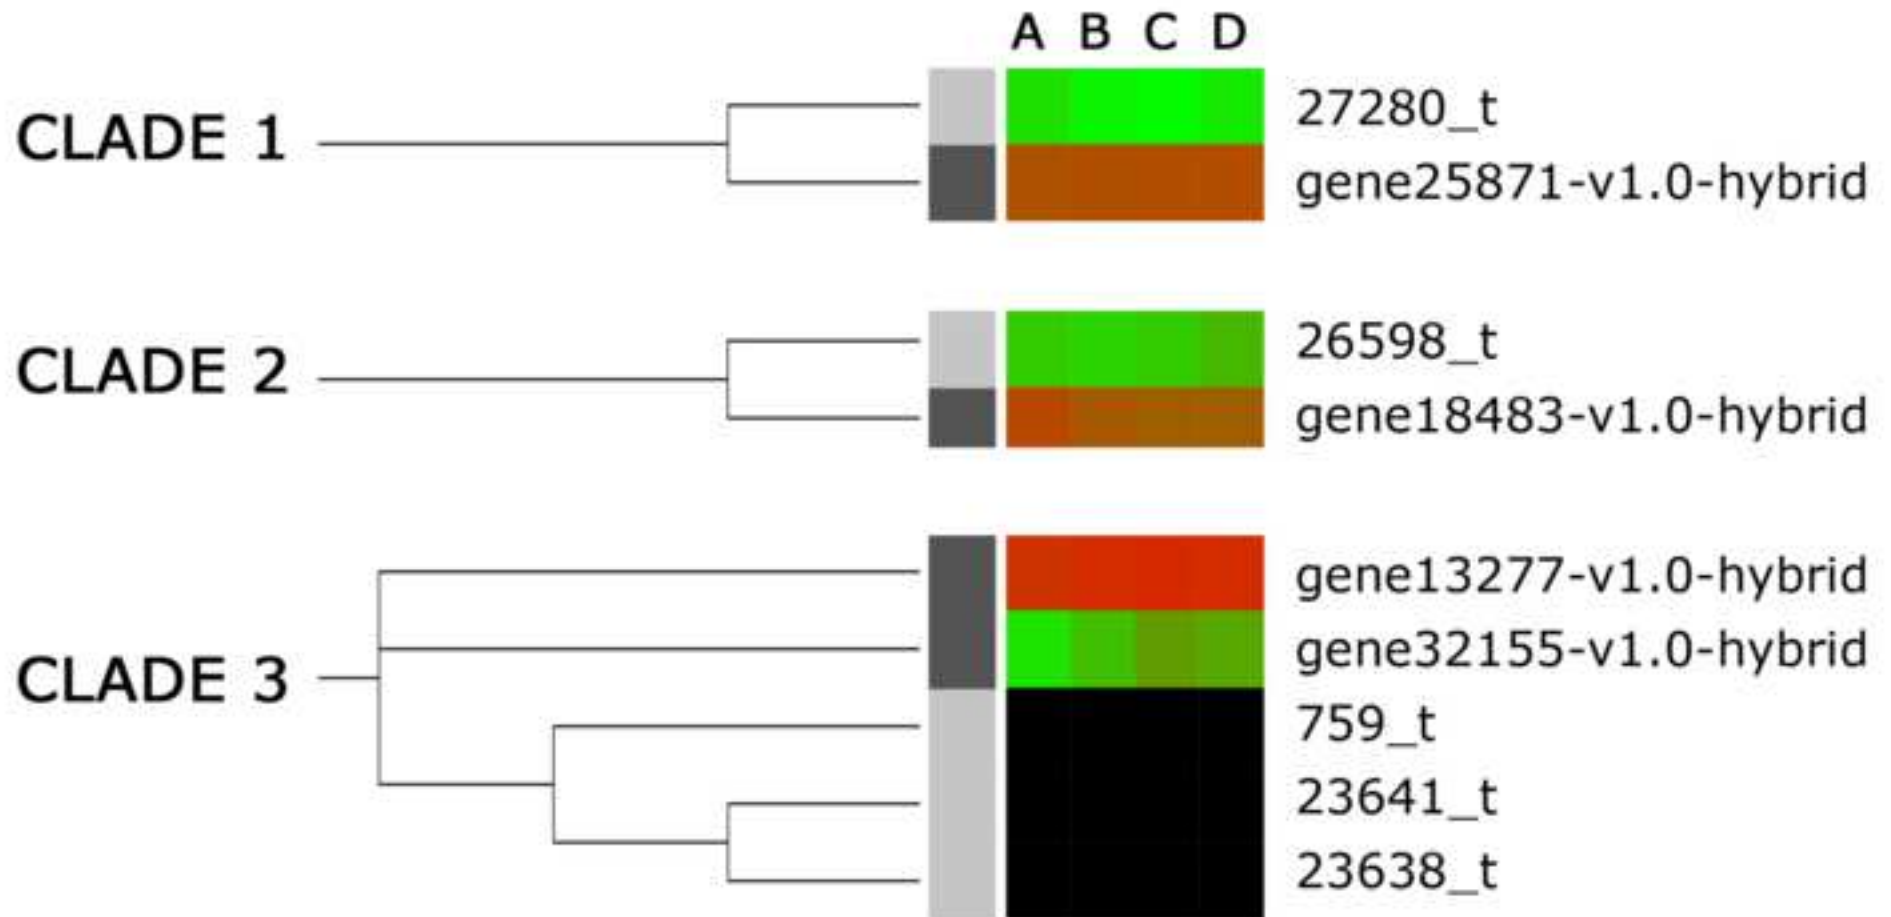



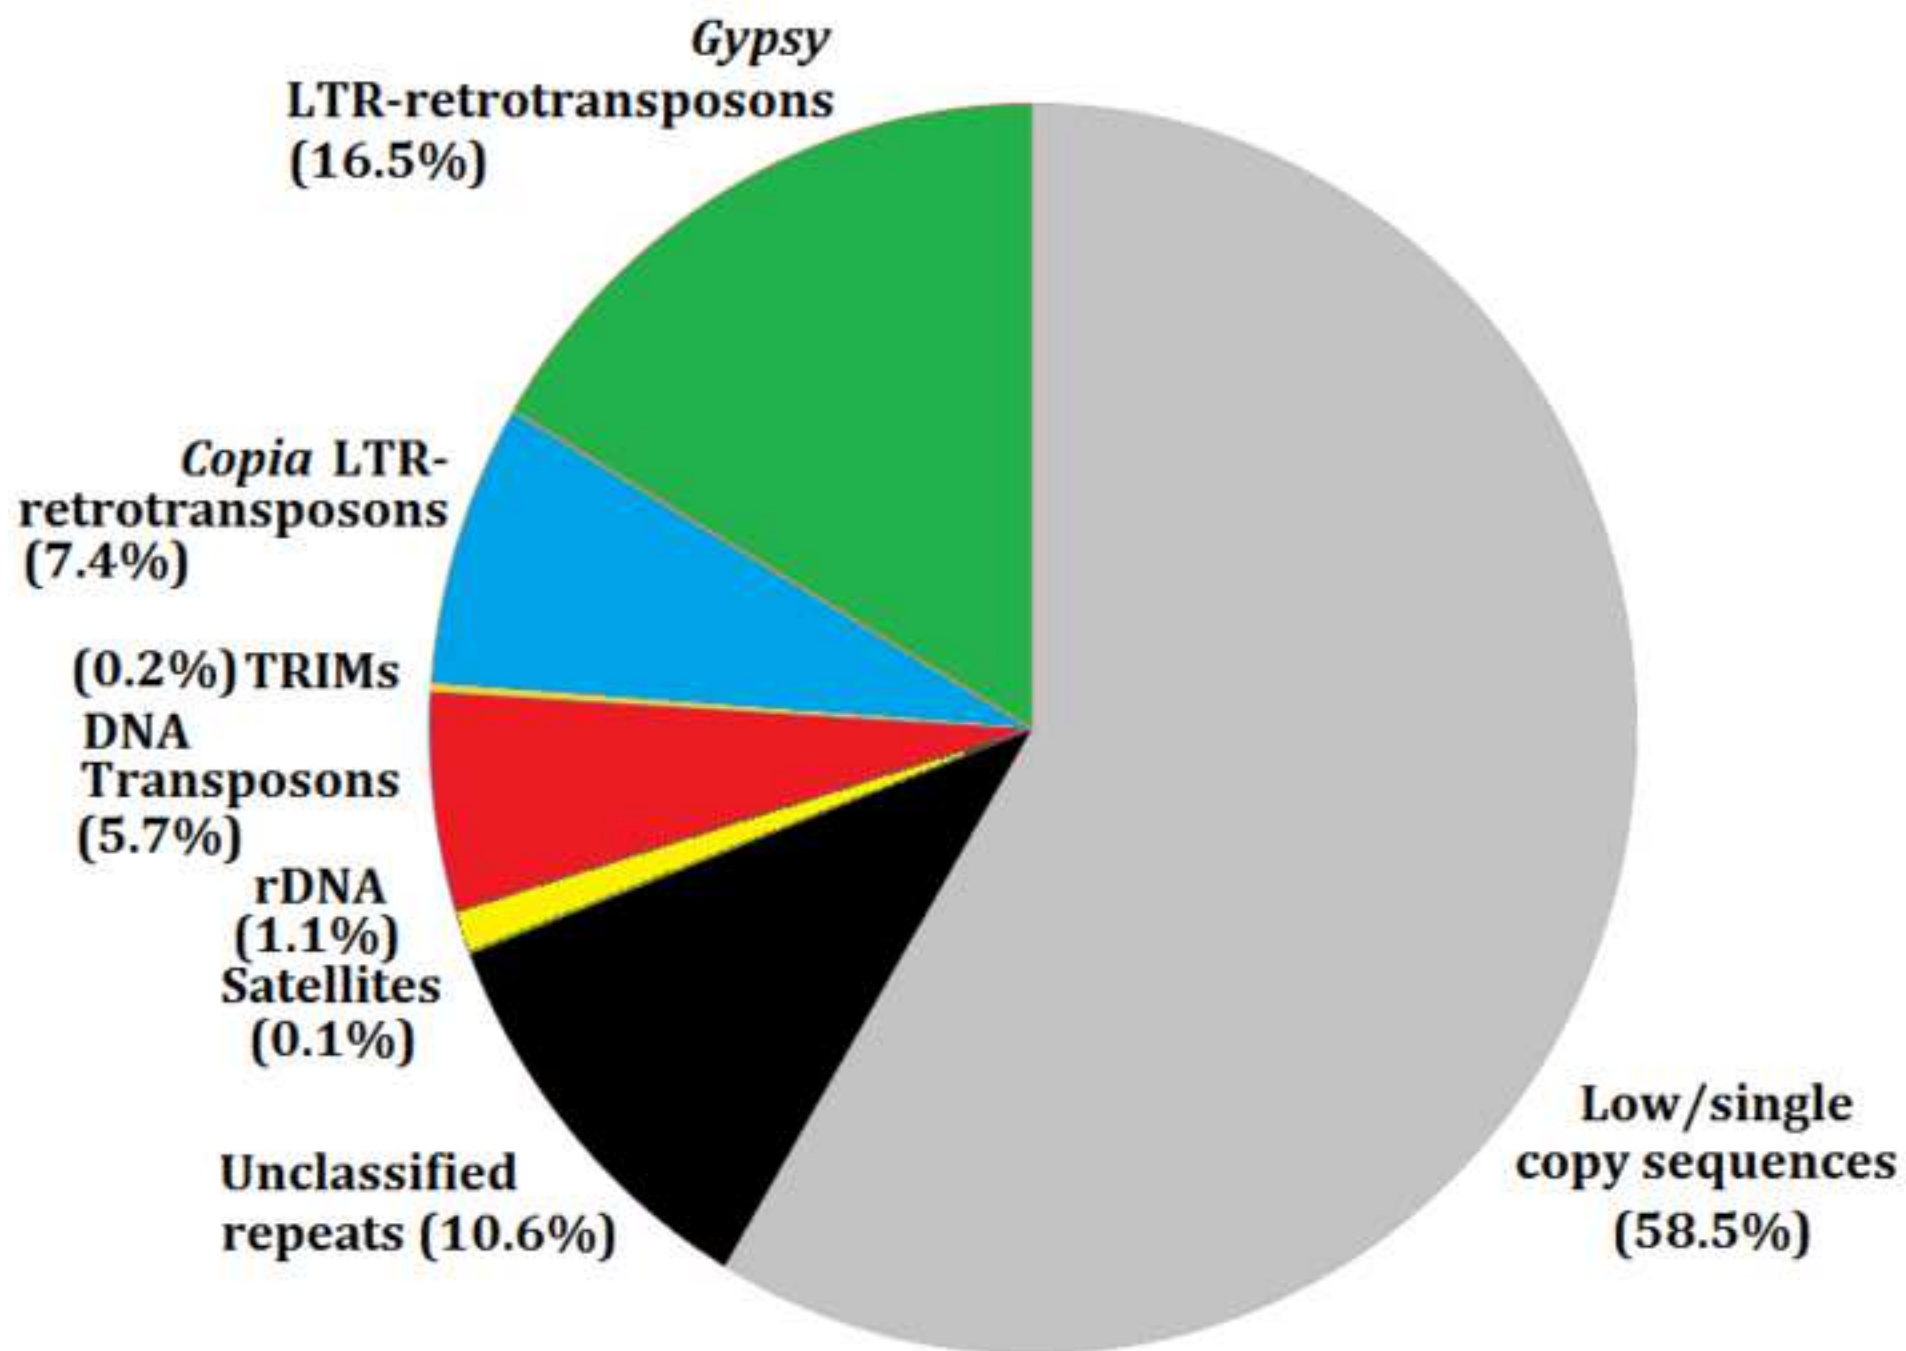

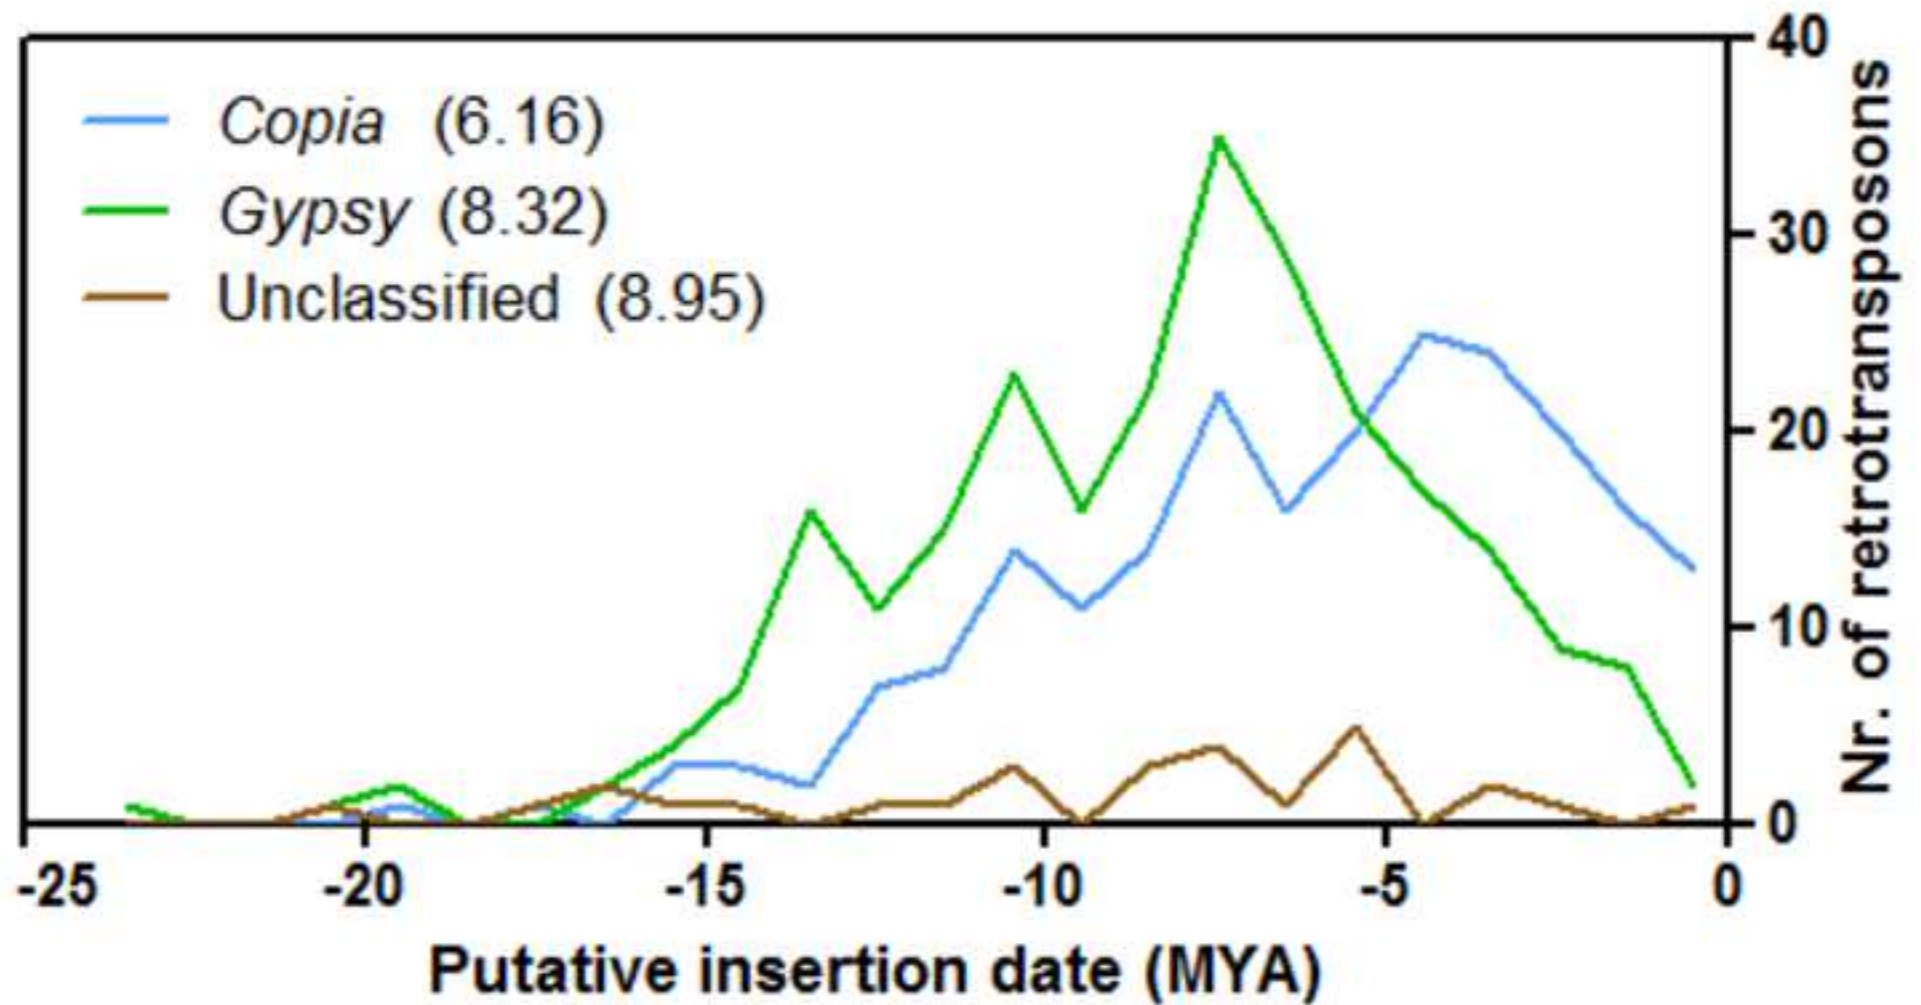

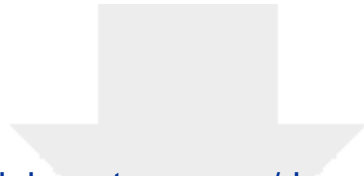

[Click here to access/download](#)

**Supplementary Material**

Additional File 1\_Tables S1 to S4.docx

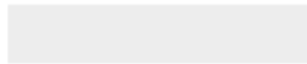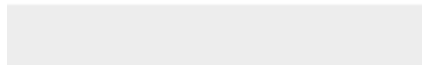

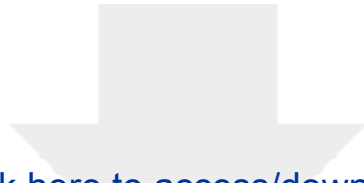

[Click here to access/download](#)

**Supplementary Material**

Additional File 2\_ Figures S1 to S5.docx

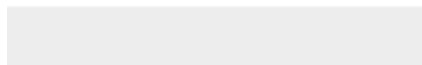





Click here to access/download  
**Supplementary Material**  
Supplementary Excel File 1.xls

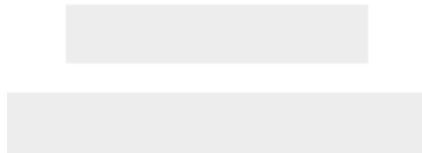

Dr Daniel James Sargent  
Driscoll's Genetics Limited  
East Malling Enterprise Centre  
New Road  
East Malling  
Kent, ME19 6BJ, UK  
27<sup>th</sup> June 2017

Dear Editor,

Please find attached our original article entitled '**The genome sequence and transcriptome of *Potentilla micrantha* shed light on the origins of the strawberry fruit development**' for consideration for publication in GigaScience. The paper is not being considered for publication elsewhere.

In our paper, we present a genome sequence and gene predictions for the genus *Potentilla*, the closest genus to *Fragaria* (the strawberry genus). We undertook to characterise a genome from this genus as a resource for the study of accessory fruit development in strawberry, since all extant strawberry species bear fleshy receptacles and those of *Potentilla* do not. The study revealed a characteristically larger genome for *Potentilla*, with evidence of extensive transposon activity, absent from *Fragaria*. However, in the gene-rich regions of the genome, remarkable conservation of synteny was observed despite 24 million years since the two genera split from a common ancestor. A comparative study of gene expression during flower and fruit development between *Potentilla* and *Fragaria* revealed genes differentially expressed between the genera, and the data presented will be a valuable resource for illuminating the mechanisms involved in fleshy fruit development.

This report builds on extensive genomics work in *Fragaria* including the sequencing of the *F. vesca* genome (Shulaev et al 2011) and the study of gene expression during fruit development (Kang et al 2013) and we feel it will be of interest to researchers investigating the evolutionary development of fleshy fruit, as well as those researching genome size, structure and evolution.

We hope you will consider sending our report for peer-review and look forward to hearing from you in due course regarding our submission,

Best regards,

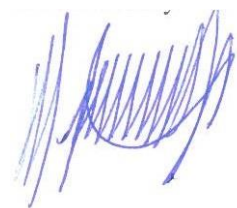

Dan Sargent
